1 ***pumilio* regulates sleep homeostasis in response to chronic sleep**  
2 **deprivation in *Drosophila melanogaster***

3 **Luis A. De Jesús-Olmo<sup>1</sup>, Norma Rodríguez<sup>1</sup>, Marcelo Francia<sup>1</sup>, Jonathan Alemán-Ríos<sup>1</sup>, Carlos**  
4 **J. Pacheco-Agosto<sup>1</sup>, Joselyn Ortega-Torres<sup>1</sup>, Richard Nieves<sup>1</sup>, Nicolás Fuenzalida-Uribe<sup>1</sup>,**  
5 **Alfredo Ghezzi<sup>1</sup>, José L. Agosto<sup>1\*</sup>**

6 <sup>1</sup>Department of Biology, University of Puerto Rico, Rio Piedras, P.R., USA.

7 **\*Correspondence:**

8 Luis A. De Jesús-Olmo

9 luis.dejesus3@upr.edu

10 **sleep homeostasis, neuronal homeostasis, *Pumilio*, *pum*, *Drosophila*, chronic sleep deprivation,**  
11 **synaptic proteins, neuronal excitability**

12  
13 **Word count: 6728**

14  
15 **Abstract**

16 Recent studies have identified the *Drosophila* brain circuits involved in the sleep/wake switch and  
17 have pointed to the modulation of neuronal excitability as one of the underlying mechanisms  
18 triggering sleep need. In this study we aimed to explore the link between the homeostatic regulation  
19 of neuronal excitability and sleep behavior in the circadian circuit. For this purpose, we selected the  
20 neuronal homeostasis protein *Pumilio* (*Pum*), whose main function is to repress protein translation  
21 and has been linked to modulation of neuronal excitability during chronic patterns of altered neuronal  
22 activity. Here we explore the effects of *Pum* on sleep homeostasis in *Drosophila melanogaster*,  
23 which shares most of the major features of mammalian sleep homeostasis. Our evidence indicates  
24 that *Pum* is necessary for sleep rebound and that its effect is more pronounced during chronic sleep  
25 deprivation (84 hours) than acute deprivation (12 hours). Knockdown of *pum*, results in a reduction  
26 of sleep rebound during acute sleep deprivation and the complete abolishment of sleep rebound  
27 during chronic sleep deprivation. These behavioral changes were associated with accompanying  
28 changes in the expression of genes involved in the regulation of neuronal excitability. Interestingly,  
29 *pum* knockdown also increased baseline daytime sleep, suggesting that *Pum* differentially regulates  
30 rebound and normal sleep. Based on these findings, we propose that *Pum* is a critical regulator of  
31 sleep homeostasis through neural adaptations triggered during sleep deprivation and induces rebound  
32 sleep by altering neuronal excitability.

33

34

## *Pumilio* regulates sleep homeostasis in response to chronic sleep deprivation in *Drosophila melanogaster*

35

### 36 **1 Introduction**

37 It is well established, even by our own experience, that the urge to sleep increases as a function of  
38 time awake. This urge, or sleep drive, triggers a prolonged compensatory sleep after the organism is  
39 sleep deprived (Daan et al., 1984; Allada, et al., 2017). This compensatory sleep, which is also called  
40 sleep rebound, is a key indicator of the homeostatic regulation of sleep (Vyazovskiy, et al., 2009). In  
41 this process, deviations from a reference level of sleep are compensated, i.e. lack of sleep fosters  
42 compensatory increase in the intensity and duration of sleep, whereas excessive sleep counteracts the  
43 sleep need (Tobler and Ackermann, 2007). More than a century of sleep research has made important  
44 progress in understanding the function of sleep and its regulatory circuitry, but the molecular basis of  
45 sleep homeostasis remains elusive (Cirelli & Tononi, 2008; Siegel 2008; Sehgal et al., 2007; Donlea  
46 2017). Understanding the molecular mechanisms involved in the regulation of sleep homeostasis is  
47 key for the overall understanding the regulation of both the sleep circuit and the sleep function. To  
48 achieve that level of understanding, we need to study the link between molecular markers, sleep brain  
49 circuits and homeostatic sleep behavior.

50 The fruit fly *Drosophila melanogaster* is an ideal model to study the molecular markers impacting  
51 sleep behavior. Sleep rebound is a stable phenotype in flies which shares most major features of  
52 mammalian sleep homeostasis (Huber, et al., 2004). *Drosophila* shows easily measurable and  
53 recognizable sleep patterns linked to reduced brain activity (Nitz et al., 2002; Van Swinderen et al.,  
54 2004), limited sensory responsiveness during sleep and display a robust homeostatic sleep rebound  
55 (Hendricks et al., 2000; Shaw, et al., 2000) as occurs in mammals. Moreover, it has been  
56 demonstrated that humans and fruit flies have a common sleep control mechanism involving GABA  
57 receptors in brain neurons linked to the circadian clock (Parisky, et al., 2009; Chung, et al., 2009). In  
58 addition, fly genetics has been used as a tool to validate human sleep biomarkers affected by sleep  
59 deprivation (Thimgan et al., 2013). Hence, we circumscribed our study of the molecular relationship  
60 between homeostatic markers and sleep behavior to the fly model.

61 Recent studies have shown that two structures of *Drosophila*'s brain central complex, the Ellipsoid  
62 Body (EB) and the fan body (FB), induce sleep when artificially activated, and produce insomnia,  
63 when inhibited (Liu, et al., 2016; Donlea, et al., 2011). Other studies have shown that neuronal  
64 microcircuits in the mushroom body (MB) drives rebound recovery after sleep deprivation  
65 (Sitaraman, et al., 2015). Follow up studies have produced important progress by identifying  
66 dopamine as the neuromodulator responsible for the homeostatic switch operation between  
67 sleep/wake, which is mediated by potassium currents (Pimentel, et al., 2016). Homeostatic sleep  
68 seems to be controlled by the dorsal FB neurons, which are electrically active during wake and  
69 electrically silent during rest (Pimentel, et al., 2016). These studies point to the regulation of neuronal  
70 excitability as an important effector of the sleep regulation. Nevertheless, the underlying molecular  
71 framework that connects neuronal excitability with sleep behavior is a relatively unexplored area of  
72 research.

73 Several genes have been identified to regulate normal sleep, but only a few genes have been linked to  
74 the molecular regulation of homeostatic sleep compensation after sleep deprivation. A mutation in  
75 the *Shaker* (*Sh*) gene, which encodes a voltage dependent potassium channel involved in membrane  
76 repolarization, increases neuronal excitability and reduces normal sleep (Cirelli et al., 2005), but fails  
77 to alter sleep rebound. Interestingly, the *Shaker* activator *sleepless* (*sss*), which encodes for a brain-  
78 enriched glycosyl-phosphatidylinositol-anchored protein, impairs sleep rebound (Koh, et al., 2008),

## ***Pumilio* regulates sleep homeostasis in response to chronic sleep deprivation in *Drosophila melanogaster***

79 perhaps by a mechanism independent of *Shaker*. The gene *crossveinless* (*cv-c*), which codes for a  
80 Rho-GTPase-activating protein, is necessary for dorsal FB neurons to transduce the excitability  
81 produced by sleep pressure into homeostatic sleep (Donlea, et al., 2014). Knocking down the *Cullin 3*  
82 (*Cul3*) ubiquitin ligase gene and its putative adaptor *insomniac* (*inc*), reduces sleep rebound after  
83 sleep deprivation (Pfeiffenberger & Allada, 2012). Mutants of fragile X mental retardation gene  
84 (*Fmr1*), a translational inhibitor that causes the most common form of inherited mental retardation in  
85 humans, have also been reported to reduce sleep rebound (Bushey, et al., 2009). In addition, it was  
86 reported that interfering with the expression of the genes *sandman* (*sand*) and *Sh* in the dorsal FB  
87 neurons, increased or decreased sleep respectively as part of the sleep/wake switch (Pimentel, et al.,  
88 2016). The regulatory picture presented by these genes and the other neuromodulators and proteins  
89 known to affect homeostatic sleep compensation seems far from complete, although together, they  
90 also point to neuronal excitability as a key component of sleep homeostatic regulation.

91 Unregulated neuronal excitability may lead to a potentially disruptive positive feedback. To cope  
92 with this, neurons have evolved compensatory mechanisms to reduce excitability. The mechanisms  
93 by which neurons stabilize firing activity have been collectively termed “homeostatic plasticity”  
94 (Marder & Prinz, 2003; Turrigiano & Nelson, 2004; Turrigiano 2008; 2012; Davis 2006; Pozo &  
95 Goda, 2010). Therefore, it is plausible that wake promoting neurons, after prolonged times of  
96 wakefulness, would utilize one of the homeostatic plasticity mechanisms to regulate neuronal  
97 excitability. In this study, we begin to explore the relationship between neuronal homeostasis  
98 mechanisms and sleep regulation by testing the role of the neuronal homeostasis gene *pumilio* (*pum*)  
99 on the regulation of compensatory sleep.

100 The protein encoded by *pum* is characterized by a highly conserved RNA-binding domain, which  
101 acts as a post-transcriptional repressor of mRNA targets. Binding occurs through an RNA consensus  
102 sequence in the 3'-UTR of target transcripts—the Pumilio Response Element (PRE), 5'-  
103 UGUANAUA-3', that is related to the Nanos Response Element (NRE) (Wang et al., 2018). While it  
104 was originally described in *Drosophila* for its critical role in embryonic development, Pum has an  
105 important role in the development of the nervous system. Pum is known for controlling the  
106 elaboration of dendritic branches (Ye, et al., 2014), and is also required for proper adaptive responses  
107 and memory storage (Dubnau, et al., 2003). Evidence of its regulatory role in neuronal homeostatic  
108 processes include Pum's repression of translation of the *Drosophila* voltage-gated sodium channel  
109 (*paralytic*) in an activity dependent manner (Mee, et al., 2004; Murano, et al., 2008). Pum-mediated  
110 repression of the voltage gated sodium channel plays a pivotal role in the regulation of neuronal  
111 homeostasis, given the central role of the sodium channel in the regulation of membrane excitability  
112 (Weston & Baines, 2007). Furthermore, *pum* was found to be necessary for the homeostatic  
113 compensation of increased neuronal activity, or what is known as homeostatic synaptic depression  
114 (Fiore, et al., 2014). In addition, Pum has been found to influence synaptic bouton size/number,  
115 synaptic growth and function by regulating expression of eukaryotic initiation factor 4E (eIF4E),  
116 which is the limiting factor for the initiation of the CAP dependent translation in Eukaryotes (Menon,  
117 et al., 2004; Vessey, et al., 2006; Cao, et al., 2009). Pum was our first choice to study neuronal  
118 homeostasis effects on compensatory sleep because microarray experiments show that *pum* is  
119 expressed in PDF-expressing cells, which are key circadian cells known to promote wakefulness in  
120 *Drosophila* (Kula-Eversole, et al., 2010; Parisky, et al. 2008). With over 1000 potential targets and  
121 many others indirect targets through its eIF4E regulatory role, based on the cumulative evidence,  
122 Pum could be considered a master regulator of neuronal homeostatic processes (Gerber, et al. 2006;  
123 Chen, et al. 2008; Menon, et al. 2004).

124

## ***Pumilio* regulates sleep homeostasis in response to chronic sleep deprivation in *Drosophila melanogaster***

125 Our data shows that sleep rebound is reduced by knocking down *pum* in the circadian circuit. This  
126 effect is more pronounced after chronic sleep deprivation in comparison with acute sleep deprivation.  
127 Our behavioral and molecular data correlates with *pum*'s differential involvement in regulating  
128 compensatory sleep as a function of sleep need. This, in turn, suggests a mechanistic framework for  
129 linking sleep function and regulation through neuronal homeostasis mechanisms.

130

### **131 Results**

#### **132 *Pumilio* regulates sleep rebound differentially between acute and chronic mechanical sleep 133 deprivation**

134 Studies exploring the mechanisms of neuronal homeostasis often involve long-term manipulations of  
135 neural activity, spanning from 48 hours to the entire life span (Davis, 2013; Turrigiano et al., 1998;  
136 Turrigiano, 2012). Moreover, studies linking *pum* with neuronal homeostasis primarily use genetic  
137 manipulations that alter neuronal activity throughout the lifetime of the organisms (Weston and  
138 Baines, 2007; Mee et al., 2004; Muraro et al., 2008). Thus, in this study we decided to explore the  
139 role of *pum* in the regulation of sleep homeostasis induced by chronic (long-term) sleep deprivation  
140 as well as acute sleep deprivation (SD).

141 We knocked down the expression of *pum* using a transgenic fly containing a *pum* RNA interference  
142 construct (*pum*<sup>RNAi</sup>) under control of the upstream activating sequence (UAS) of the yeast  
143 transcription factor Gal4. To activate the UAS-*pum*<sup>RNAi</sup> we used a second transgenic construct that  
144 expressed Gal4 under control of the *timeless* (*tim*) gene promoter (*tim*-Gal4). When both transgenes  
145 are present in the same fly (*tim*-Gal4/UAS-*pum*<sup>RNAi</sup>), the *pum*<sup>RNAi</sup> construct is expressed  
146 constitutively in *tim* expressing neurons. We selected the *tim*-Gal4 driver because it is a strong and  
147 broadly expressed promoter targeting circadian cells found in several brain structures including the  
148 wake promoting, PDF-expressing ventral lateral neurons and both the EB and FB neurons (Kaneko &  
149 Hall 2000).

150 In our first set of experiments, we subjected the *pum*<sup>RNAi</sup> (UAS-*pum*<sup>RNAi</sup>/*tim*-Gal4) and their “sibling”  
151 control flies (UAS-*pum*<sup>RNAi</sup>/+), which carry the *pum*<sup>RNAi</sup> construct by itself, to either chronic or acute  
152 mechanical SD protocol. In both protocols, flies were placed in the Drosophila Activity Monitors to  
153 be monitored for 6 days for baseline sleep. After the 6th day, flies were subjected to mechanical SD  
154 using an apparent random shaking program (see methods). Both chronic and acute deprivation  
155 protocols were identical in terms of stimulus intensity and pattern; the only difference was the  
156 duration of the deprivation period. For chronic sleep deprivation, the SD protocol was active for the  
157 first 84 hours starting at the beginning of the first dark period (Fig.1), while for acute sleep  
158 deprivation, the SD protocol lasted only 12 hours, which encompassed the entirety of the dark period  
159 preceding the sleep recovery period.

160 The results from the chronic SD showed a strong effectiveness of the sleep deprivation method  
161 during the first 12 hours (Fig. 1A). However, as time progressed, we noticed a gradual increase in the  
162 amount of sleep in all the sleep deprived genotypes during sustained mechanical deprivation.  
163 However, this increase in sleep through time did not seem to affect the sleep rebound, as control flies  
164 were able to produce a normal sleep rebound pattern that initiated at the 84<sup>th</sup> hour—immediately after  
165 the SD protocol was terminated (Fig. 1 A-B). Surprisingly, we noticed that *pum*<sup>RNAi</sup> flies did not  
166 show any rebound (Fig. 1C). To determine if this lack of sleep rebound was related to an insufficient



## ***Pumilio* regulates sleep homeostasis in response to chronic sleep deprivation in *Drosophila melanogaster***

167 sleep deprivation, we quantified the sleep lost and used this value to normalize the sleep recovery  
168 after deprivation. The quantification of cumulative sleep loss during the 84-hour deprivation period  
169 showed a significant difference between the *pum*<sup>RNAi</sup>/*tim*-Gal4 flies and the *tim*-Gal4/+ control flies,  
170 but no difference between the *pum*<sup>RNAi</sup>/*tim*-Gal4 flies and the UAS-*pum*<sup>RNAi</sup>/+ controls (Fig 1D).  
171 The fact that this difference was not significant between both controls and *pum*<sup>RNAi</sup> flies, suggests the  
172 difference in effectiveness could be due to the genetic background rather than the knockdown of  
173 *pum*. The results for sleep recovery show a normal recovery pattern in both controls after sleep  
174 deprivation as indicated by the increase in cumulative sleep recovered during the first hours after SD,  
175 when compared to non-sleep deprived flies during the same time period (Fig. 1E). After normalizing  
176 by the sleep lost, *pum*<sup>RNAi</sup> flies showed a negative sleep recovery, which indicates *pum*<sup>RNAi</sup> flies were  
177 more active than the non-deprived controls after 84 hrs of continuous deprivation (Fig. 1E). This loss  
178 of homeostatic regulation in the recovery of *pum*<sup>RNAi</sup> flies was maintained up to 96 hours post-  
179 deprivation (see supplementary figure S2). In our experiments, the UAS-*pum*<sup>RNAi</sup>/+ control lines are  
180 siblings of the UAS-*pum*<sup>RNAi</sup>/*tim*-Gal4 flies. Meanwhile the *tim*-Gal4/+ controls were generated  
181 directly by crossing the parental *tim*-Gal4 line with a non-transgenic wild-type (CS), which can  
182 introduce differences in genetic background. Thus, our conclusions are based mostly on the results  
183 from “sibling controls” because they have a greater genetic similarity, which results in a more similar  
184 baseline sleep pattern than parental controls (Figs. 1 A-C). Hence, for the acute SD experiments,  
185 parental controls were not used.

186 The results from the 12 hours acute SD showed sleep lost effectivity close to 100% for both *pum*<sup>RNAi</sup>  
187 and “sibling” controls (Fig. 2A-B). During the deprivation period (0 to 12 hours), the cumulative  
188 sleep loss in deprived flies did not show a significant difference between the two genotypes (Fig. 2E)  
189 Once again, controls showed an effective sleep rebound (Fig. 2A), while *pum*<sup>RNAi</sup> flies showed a  
190 reduction in sleep rebound (Fig. 2B). However, this time the rebound was not completely abolished  
191 as we observed during chronic SD (Fig. 2B vs 2D). We included the chronic deprivation rebound  
192 period as a point of comparison between acute vs chronic (Figs. 2C-D). The results from the acute  
193 SD sleep recovery resembled the results from chronic SD with a normal rebound in “sibling” controls  
194 and reduced sleep recovery in *pum*<sup>RNAi</sup> flies. Nevertheless, the sleep recovery of *pum*<sup>RNAi</sup> flies was not  
195 negative as we observed during chronic SD (Fig. 2F). When acute vs chronic SD results are  
196 compared (Fig 2G), we see significant differences, not only between the genotypes, but also within  
197 *pum*<sup>RNAi</sup> flies exposed to acute vs chronic SD, while the rebound difference of the “sibling” control  
198 between acute vs chronic SD remains constant. These results suggest that *pum* differentially regulates  
199 acute vs chronic SD. This interpretation is in fact reinforced by our molecular experiments  
200 contrasting gene expression changes between acute and chronic SD as reported below and in the  
201 supplementary material (supplementary Fig S3).

202 So far, our findings link the duration of sleep deprivation to *pum* regulation, which is consistent with  
203 the expected role of neuronal homeostasis on sleep regulation. Since we observed greater  
204 homeostatic changes during chronic SD, we continued throughout the study using chronic SD to  
205 measure *pum*'s regulatory effects in compensatory sleep. The difference in sleep rebound between  
206 *pum*<sup>RNAi</sup> vs parental flies does not seem to be related to non-specific effects of the genetic  
207 background affecting baseline sleep because daytime baseline sleep of *pum*<sup>RNAi</sup> flies is higher than  
208 both parental and “sibling” controls (supplementary Fig S1). If baseline sleep would have been a  
209 contributing factor for the recovery results, we should have expected a higher sleep rebound. The fact  
210 that we obtained a lower rebound indicates *pum* knockdown rather than genetic differences  
211 influencing baseline sleep are the culprit of our results.

## ***Pumilio* regulates sleep homeostasis in response to chronic sleep deprivation in *Drosophila melanogaster***

212

### **213 *Pumilio* differentially changes expression level of genes associated with neuronal excitability in 214 chronic vs acute SD**

215 To determine if the reduction in homeostatic sleep rebound observed in *pum*<sup>RNAi</sup> flies can be  
216 explained by changes in gene expression, we performed a quantitative reverse-transcription  
217 polymerase chain reaction (qRT-PCR) for a selected group of genes encoding synaptic proteins,  
218 synaptic translation modulators, neurotransmitter receptors and ion channels. In addition, we wanted  
219 to assess if the behavioral differences observed between acute vs chronic SD correlated with gene  
220 expression patterns. If *Pum* is necessary to reduce neuronal excitability caused by the high neural  
221 activity induced by SD, then knocking down *pum* should increase gene expression of synaptic  
222 proteins associated with neuronal excitability. In addition, if *Pum* recruitment is directly influenced  
223 by sleep need, as suggested by the behavioral differences between acute vs chronic sleep, then the  
224 increased sleep need during chronic SD would cause a differential expression of synaptic markers  
225 between acute and chronic SD.

226 For our analysis, we selected the synaptic genes *bruchpilot* (*brp*), *disks large 1* (*dlg1*) and *Synapsin*  
227 (*Syn*) as their protein products are known to increase after acute SD, as shown by western blots of  
228 whole fly brains (Gilestro, et al., 2009). In addition, we selected three genes that encode translation  
229 regulators —the *eukaryotic translation initiation factor 4E1* (*eIF4E1*), *Target of rapamycin* (*Tor*),  
230 and the Protein Kinase B (*Akt1*) because, as previously stated, EIF4E is a direct *Pum* target and both  
231 TOR and AKT are upstream regulators of EIF4E (Miron, et. al., 2003). We also included genes for  
232 the voltage gated sodium channel *paralytic* (*para*), the voltage gated potassium channel *Shaker*  
233 *cognate 1* (*Shal*) and *slowpoke* (*slo*), and the potassium channel modulator *sleepless* (*sss*, also known  
234 as *quiver* (*qvr*)), due to their relation to neuronal excitability. To complete the qRT-PCR testing  
235 panel, we also included the nicotinic Acetylcholine Receptor gene (*nAchRa1*), the GABA<sub>A</sub> receptor  
236 gene *Resistant to dieldrin* (*Rdl*) and the *Glutamic acid decarboxylase 1* (*Gad1*), which synthesize for  
237 the enzyme that synthesizes the inhibitory neurotransmitter GABA (Lee, et al., 2003), because they  
238 also have been associated to regulations in neuronal excitability (see table S1 for references).

239 The RNA for the qRT-PCR study was extracted from whole heads, which were frozen two hours  
240 after the completion of the SD protocol. We evaluated the gene expression for non-deprived  
241 conditions against acute SD (12 hours) and chronic SD (84 hrs). The non-deprived results come from  
242 flies of each of the phenotypes handled in parallel to the deprived flies during the same experimental  
243 dates. First, we assessed the effects of *pum* knockdown within non-deprived flies on basal gene  
244 expression of our gene panel. Results show that the expression of *Shal* and *Gad1* was significantly  
245 increased in *pum*<sup>RNAi</sup> flies as compared to the sibling controls (Fig. 3A). These results align with  
246 previous studies characterizing *pum* effects in neuronal excitability, which have shown a significant  
247 diminution of *Shal* mRNA when *pum* is overexpressed pan-neuronally (Murano, et. al., 2008). In  
248 addition, the expression increase in the inhibitory neurotransmitter synthesis enzyme *Gad1* was  
249 expected because *Gad1* is a predicted target of *Pum* (Chen, et al., 2008). Furthermore, it has been  
250 shown that GABA acts as a slow inhibitory neurotransmitter in circadian neurons (Hamasaka, et al.,  
251 2005), promoting fly sleep (Parisky, et al., 2008). The fact that *pum*<sup>RNAi</sup> flies showed increase levels  
252 of *Shal* and *Gad1* in non-deprived flies, suggests that the presence of *Pum* is also necessary to  
253 maintain normal sleep. This fact was corroborated by the increase in baseline sleep of *pum*<sup>RNAi</sup> flies  
254 (supplementary Fig. S1), which should be expected under increased GABAergic inhibition of wake  
255 promoting neurons (Parisky, et al., 2008).

## ***Pumilio* regulates sleep homeostasis in response to chronic sleep deprivation in *Drosophila melanogaster***

256 Next, we assessed the changes in gene expression induced by acute and chronic SD, in both *pum*<sup>RNAi</sup>  
257 flies and sibling controls. The qRT-PCR results showed that four genes displayed significant  
258 expression changes after acute SD but no change in response to chronic SD. These genes are:  
259 *nAchRa1*, *Rdl*, *para* and *slo* (Fig. 3B-E). For *nAchRa1*, this change was exacerbated in the *pum*<sup>RNAi</sup>  
260 flies, whereas for *Rdl*, *para* and *slo*, the effect of acute SD in expression observed in control flies was  
261 abolished by the knockdown in *pum*. In contrast, eight different genes displayed significant changes  
262 between *pum*<sup>RNAi</sup> flies and sibling controls in response to chronic SD, but no change in response to  
263 acute SD (Fig. 3F-M). A *pum* knockdown-dependent increase was observed in *eIF4E1*, *Tor*, *Akt*, *brp*,  
264 *dl*, and *Shal*; whereas a *pum* knockdown-dependent decrease was observed in *Syn* and *Gad1*. These  
265 results showed a concordance between the selected markers overexpressed by *pum*'s knockdown and  
266 their association with increased neuronal excitability. We observed gene expression increases in  
267 *pum*<sup>RNAi</sup> flies but not in the “sibling” controls in synaptic translation genes like *eIF4E*, *Tor*, *Akt*  
268 (Penney, et al., 2012; Lee, et al., 2011; Howlett, et al., 2008) (Fig 3F-H); and genes coding for  
269 synaptic proteins like *brp* and *dlg* (Kittel, et al., 2006; Prange, et al., 2004) (Fig 3I-J). In addition, we  
270 saw an expression increase the *Shal* potassium channel (Fig 3K), which has been associated with  
271 neuronal excitability during repetitive locomotor activity (Ping, et al., 2011). We also saw an  
272 expression decrease in the synaptic protein gene *Syn* (Fig. 3L). The silencing of *Syn* increases  
273 intrinsic cell excitability associated with increased Ca<sup>2+</sup> and Ca<sup>2+</sup>-dependent BK currents (Brenes, et  
274 al., 2015), which is also aligned with our expected results. In addition, *Gad1* was also less expressed  
275 in the *pum*<sup>RNAi</sup> flies than their respective controls. These results are expected because GABAergic  
276 inhibition of wake promoting neurons has been shown to regulate sleep in *Drosophila* (Agosto, et al.,  
277 2008; Chung, et al., 2009). These combined results confirmed our hypothesis that *pum*'s effects in  
278 compensatory sleep behavior is correlated to changes in gene expression from selected neuronal  
279 excitability genes, and that acute vs chronic SD exhibit differential gene expression patterns, which  
280 points towards a differential regulation in acute vs chronic SD.

### **281 *Pumilio* mutants show reduced sleep rebound**

282 Finally, we used mutant fly lines to further validate our results independently of transgenic flies. To  
283 confirm the effects of *pum* knockdown in sleep homeostasis we selected the classical loss of function  
284 allele *pum*<sup>13</sup> (also known as *pum*<sup>680</sup>). *Pum*<sup>13</sup> is a dominant negative allele that bears a single amino  
285 acid substitution, which not only knocks down *pum* function but also interferes with normal *pum*  
286 function in heterozygotes (Wharton, et al., 1998). Thus, in addition to the semi-lethal *pum*<sup>13</sup>  
287 homozygous mutants, we used *pum*<sup>13</sup>/*TM3* heterozygotes in our experiments.

288 The sleep deprivation produced similar sleep lost amounts in each of the lines tested. Fig 4A-C and  
289 D). Nonetheless, the sleep recovery showed a significant difference between both wild type (+/+) and  
290 *pum*<sup>13</sup>/+ flies compared to *pum*<sup>13</sup>/*pum*<sup>13</sup> flies (Fig 4E). By the end of the recovery period, the  
291 differences between *pum*<sup>13</sup>/+ and the knockout *pum*<sup>13</sup>/*pum*<sup>13</sup> were still maintained. Moreover,  
292 *pum*<sup>13</sup>/*pum*<sup>13</sup> escaper flies completely abolished rebound to chronic sleep deprivation for the first 12  
293 hours of the recovery period (Fig. 4E). This suggests that differential *pum* levels between the  
294 heterozygote and the *pum*<sup>13</sup> homozygote, have correlative regulatory effects in sleep rebound.

295 Additionally, we used the p-element insertion *pum* allele, Milord-1, to confirm the mutant results  
296 with another independent line. This line was generated by single transposon mutagenesis inserted in  
297 the *pum* transcriptional unit (Dubnau, et al., 2003). We compared this line with controls obtained  
298 from a wild type stock Canton S flies. As expected, Milord-1 flies showed a significant sleep rebound  
299 reduction (Fig 5D). Although there was a significant sleep lost difference between the genotypes at  
300 the end of the deprivation period (Fig. 5C), the ANOVA table results did not show a significant

## *Pumilio* regulates sleep homeostasis in response to chronic sleep deprivation in *Drosophila melanogaster*

301 difference between the genotypes for the whole deprivation period. In addition, the sleep recovery  
302 calculation normalizes by the sleep lost, therefore, any sleep lost differences affecting the results  
303 have already been considered.

304

### 305 **Discussion:**

306 Through a combination of transgenic RNAi knockdown and mutant analysis, our results indicate that  
307 *pum* is necessary for the compensatory sleep behavior displayed after sleep deprivation in  
308 *Drosophila*. The *pum*-dependant regulation of sleep compensation, and its effects on synaptic gene  
309 expression, increases as sleep needs increases. Compensatory sleep rebound after a 12-hour sleep  
310 deprivation protocol (acute SD) was slightly reduced by knockdown of *pum* in *tim* neurons, but  
311 completely abolished after 84-hour of sleep deprivation (chronic SD). These differential effects were  
312 accompanied by a series of distinct changes in the expression of genes encoding synaptic proteins as  
313 well as synaptic translation factors. Together our data suggests that neuronal homeostasis  
314 mechanisms led by Pum differentially regulate compensatory sleep after acute and chronic SD, most  
315 likely through the regulation of neuronal excitability.

316 Interestingly, we also observed that *pum*<sup>RNAi</sup> flies have increased day-time sleep in non-deprived  
317 conditions (Fig. 1, Fig. S1A), suggesting that other sleep behaviors are also regulated by *pum*. This  
318 effect of *pum* could perhaps be explained by the increased expression levels of *Gad1* and *Shal* in  
319 *pum*<sup>RNAi</sup> non-deprived flies, as both genes are associated with a depression in overall neural activity.  
320 Additionally, the role of *pum* on regulating baseline sleep seems to be disconnected from its role in  
321 regulating sleep rebound. For instance, the daytime baseline sleep, in *pum*<sup>RNAi</sup> flies is about two times  
322 the baseline of both control flies (Fig. S1A), but the same flies showed no rebound sleep after SD,  
323 suggesting that the homeostatic sleep rebound is independently regulated from baseline sleep. This  
324 interpretation is supported by reports from other groups. Shaw, et al, (2002) previously reported that  
325 *cycle* (*cyc01*) mutants showed an exaggerated response to sleep deprivation, which was 3 times as  
326 high as baseline sleep. In a similar way, Seidner, et al., (2002) found evidence suggesting that  
327 baseline sleep and homeostatic sleep can be regulated by distinct neural circuits.

328 Initial studies of chronic SD in other species have also pointed to a potential difference in the  
329 regulatory mechanisms between acute vs chronic SD. Rats exposed to chronic SD do not seem to  
330 regain the sleep lost even after a full 3-day recovery period, whereas in acute deprivation, most of the  
331 sleep was regained (Kim, et al., 2007). Critics attributed these differences, between acute and chronic  
332 SD, to the increase in sleep pressure, which force micro-sleep episodes or EEG artifacts during  
333 chronic SD (Leemburg, et al., 2010). A recent study showed that chronically sleep deprived animals  
334 no longer expressing the compensatory increases that characterize sleep homeostasis in daily sleep  
335 time and sleep intensity (Kim, et al., 2013). The authors of the study suggested that this decoupling  
336 of sleepiness from sleep time/intensity imply that there is one sleep regulation system mediating  
337 sleepiness (homeostatic), and another regulatory system for sleep time/intensity (allostatic) (Kim, et  
338 al., 2013). Whether the lack of sleep compensation observed during chronic SD is a real mechanistic  
339 phenomenon or an artifact of the deprivation method remained controversial. In our study, we wanted  
340 to test if the behavioral differences reported by the literature, between acute and chronic SD, were  
341 regulated by the same mechanism under the *pum* gene. Our results point to the presence of a  
342 differential homeostatic response between acute vs chronic SD in *pum* knockdowns, which suggests  
343 that *pum* participation in sleep homeostatic regulation is proportional to sleep need. Our data  
344 indicates that *pum* regulation of sleep rebound is done through the activation of different genes



## ***Pumilio* regulates sleep homeostasis in response to chronic sleep deprivation in *Drosophila melanogaster***

345 between acute and chronic SD. This difference seems to be aligned with fast action ion channel genes  
346 for acute SD and translation related and/or genes in which we expect to require more time to become  
347 active for chronic SD. Furthermore, we can hypothesize that individual neuroadaptations either  
348 promote or inhibit sleep rebound, and the neuroadaptations that promote rebound accumulate with  
349 sleep need. In this scenario, *pum* seems to be a key player among neuroadaptations promoting sleep  
350 rebound, which can be confirmed by the fact that *pum*<sup>RNAi</sup> flies continued with a lower sleep recovery  
351 for a few days after SD was discontinued (Fig. 2S).

352 The qRT-PCR results support the hypothesis that *pum*<sup>RNAi</sup> flies are in a higher excitable state than  
353 “sibling” controls. The significant expression increase observed in *nAchRa1* (Fig. 3B) during acute  
354 SD aligns with an increase excitability in *pum*<sup>RNAi</sup> flies as acetylcholine is a major excitatory  
355 neurotransmitter. Furthermore, in mammals, acetylcholine has been shown to control the excitability  
356 of the circadian Suprachiasmatic nucleus (SCN) (Yang, et al., 2010). Also, *pum*<sup>RNAi</sup> flies showed  
357 significantly less expression of the GABA receptor gene *rdl* compared to the “sibling” control (Fig.  
358 3C). Previous studies have shown that reduced expression of *rdl* in PDF wake promoting neurons  
359 reduces sleep (Chung, et al., 2009), which could also explain the reduced sleep rebound of *pum*<sup>RNAi</sup>  
360 flies. Additionally, the potassium channel *slo* also showed an increased expression in the “sibling”  
361 control compared to *pum*<sup>RNAi</sup> flies. *slo* has been found to both increase or decrease neuronal  
362 excitability depending on the circuit where it was manipulated (Jepson, et al., 2013), therefore, we  
363 need to view this result in the context of the other gene expression changes.

364 The expression increases in *eif4e*, *Tor*, *Akt*, *brp*, *dlg*, and *Shal*, in *pum*<sup>RNAi</sup> flies during chronic SD,  
365 are aligned with an expected increase in neuronal excitability induced by prolonged wakefulness and  
366 the knockdown of *pum* in the circadian circuit. Studies have shown that down-regulation of the Pum  
367 target eIF4E, reduced dendritic spine branching, thus affecting spine morphogenesis and synaptic  
368 function (Vessey, et al., 2010). Other studies have shown that TOR promotes retrograde  
369 compensatory enhancement in neurotransmitter release key to the homeostatic response in the  
370 *Drosophila* NMJ (Penney, et al., 2012). In addition, the levels of p-Akt increases strongly after  
371 glutamate application in *Drosophila* larvae (Howlett, et al., 2008). The *brp* mutants have shown  
372 impaired vesicle release and reduced Ca<sup>+</sup> channels density in *Drosophila* neuro muscular junction  
373 (NMJ) (Kittel; et. Al., 2006), thus increased levels of BRP are important for efficient  
374 neurotransmitter release. In mice, the overexpression of Pum target Dlg (also known as PSD-95),  
375 resulted in enhanced excitatory synapse size and miniature frequency and a reduced the number of  
376 inhibitory synaptic contacts (Prange, et al., 2004). Moreover, blocking the potassium channel *Shal* in  
377 wake promoting neurons, delays sleep onset (Feng, et al., 2018), suggesting neuronal excitability of  
378 wake promoting neurons regulates sleep. Furthermore, *Syn*, which is associated with reserve vesicle  
379 release (Gitler, et al., 2008), showed a reduced expression in our qRT-PCR results. These results are  
380 also correlated to neuronal excitability. A study in mice reported increases in spontaneous and  
381 evoked activities in *Syn* knockouts (Chiappalone, et al., 2008). In sum, the expression changes of all  
382 these targets in sleep deprived UAS-*pum*<sup>RNAi</sup>/*tim*-Gal4 knockdown compared to the control flies  
383 demonstrates that the observed *pum* effects in chronic compensatory sleep can be associated with  
384 significant molecular changes aligned with changes into structural synaptic homeostasis that underlie  
385 an increased neuronal excitability in whole brain.  
386

387 Out of the fourteen genes tested, only *para*, a direct Pum target, was contrary to our expectation  
388 during acute SD. Although *tim*-Gal4 is strongly expressed in glial cells (Kaneko & Hall, 2000), the  
389 circadian neurons expressing *tim*-Gal4 represent a relatively small number of cells in the fly brain,

## ***Pumilio* regulates sleep homeostasis in response to chronic sleep deprivation in *Drosophila melanogaster***

390 therefore, gene expression effects of *pum* knockdown over its direct molecular targets will be  
391 confounded with gene expression from the rest of brain cells. Nevertheless, it is reasonable to expect  
392 an indirect over-expression in a significant number of genes associated with neuronal excitability.  
393 Some of the relatively small number of circadian neurons in the fly brain have an important wake  
394 promoting role (Parisky, et al 2008), therefore they project widely into the brain and regulate a  
395 significant proportion of it. We hypothesize that knocking down *pum* in the circadian circuit avoids  
396 brain processes to “shut down” the neuronal excitability generated during chronic SD, hence the  
397 markers for increased neuronal excitability appear to be brain-wide over-expressed. It seems that  
398 prolonged sleep deprivation induces brain-wide changes in the expression of synaptic proteins and  
399 other neuromodulators, which trigger neuronal homeostatic processes to reduce neural activity. Our  
400 data supports the hypothesis that knocking down *pum* would disrupt this regulation allowing both the  
401 molecular expression and the behavioral activity of these flies to reflect a prolonged state of neuronal  
402 excitability.

403 The decrease in sleep rebound observed in *pum* knockdown is aligned with an increase in neuronal  
404 excitability, which was expected based on our hypothesis, by reducing the expression of the neuronal  
405 homeostasis gene *pum*. *Pum* is known to regulate sodium currents (*Ina*) and excitability in  
406 *Drosophila* motor neurons through translational repression and binding with *para*-RNA (Baines, et  
407 al., 2003), therefore reducing the number of available sodium channels. Reducing *pum* expression  
408 means there could be more sodium channels available and consequently, more neurons excited.  
409 Those excited neurons would have a diminished homeostatic mechanism to couple with the increased  
410 in excitability, resulting in prolonged wakefulness even after sleep deprivation stimulus was  
411 discontinued. Additional evidence in the literature supports the notion of a direct correlation between  
412 ion channels availability and wakefulness. Parisky, et al (2008), expressed the EKO potassium  
413 channel to hyperpolarize Ventral Lateral neurons (LN<sub>v</sub>) to reduce their excitability. In addition, they  
414 knocked down the *Shaw* potassium channel gene or expressed a dominant-negative Na<sup>+</sup>/K<sup>+</sup>-ATPase  
415  $\alpha$  subunit in the pdf LN<sub>v</sub> neurons in order to increase neuronal excitability. The results showed that  
416 suppressed LN<sub>v</sub>s increased sleep whereas hyperactive LN<sub>v</sub>s increased wake. Furthermore, studies in  
417 rats have shown increases in cortical neurons firing with increase in time awake (Vyazovskiy, et al.,  
418 2009). Moreover, Donlea, et al, (2014) found that the *crossveinless* (*cv-c*) mutants show decreased  
419 electrical activity in sleep promoting dorsal fan neurons. Additionally, the same study found that  
420 sleep pressure increases electrical excitability of sleep promoting neurons and this mechanism was  
421 blunted in *cv-c* mutants. This further strengthen our argument that *pum* regulates sleep homeostasis  
422 through the regulation of neuronal excitability. Identifying that a neuronal homeostasis gene, with a  
423 characterized mechanism of action, regulates sleep homeostasis, adds an important piece of  
424 information to further understand sleep homeostatic regulation.

425 Although this is the first time the neuronal homeostasis gene *pum* is linked to sleep homeostasis,  
426 there is additional evidence in the literature supporting the concept of neuronal homeostasis as a sleep  
427 regulatory mechanism. The neuronal homeostasis protein Homer mediates homeostatic scaling by  
428 evoking agonist-independent signaling of glutamate receptors (mGluRs) which scales down the  
429 expression of synaptic AMPA receptors (Hu, et al., 2010). Deletion of Homer in *Drosophila*  
430 produces fragmented sleep and failure to sustain long sleep bouts during sleep deprivation (Naidoo,  
431 et al., 2012). In addition, experiments where flies had a mutated shaker potassium (K<sup>+</sup>) channels  
432 exhibit reduced sleep (Cirelli, et al., 2005). The close functional relationship between neuronal  
433 sodium and potassium channels suggests the expression of sodium channels could also be associated  
434 with changes in the sleep phenotype. This was corroborated in experiments where a mutation in the

## ***Pumilio* regulates sleep homeostasis in response to chronic sleep deprivation in *Drosophila melanogaster***

435 sodium Na(v)1.6 channel gene, which *pum* regulates (Driscoll, et al., 2013), caused an increase in  
436 non-rapid eye movement (non-REM) sleep in rodents (Papale, et al., 2010).

437 Further studies characterizing additional Pum targets as well as other genes involved in neuronal  
438 homeostasis warrant exciting findings about the molecular control of sleep. Moreover, identifying the  
439 specific circuits where Pum is required for sleep regulation in both flies and mammals could provide  
440 a better picture of the mechanistic relationship between sleep function and molecular sleep  
441 regulation.

442

### **Materials and methods:**

444 **Fly Stocks:** *Drosophila* stocks were raised on standard *Drosophila* medium in a 12/12 h light/dark  
445 cycle. The following stocks were used in this study: The UAS-*pum*<sup>RNAi</sup> (stock #26725: y[1] v[1];  
446 P{y[+t7.7] v[+t1.8]=TRiP.JF02267}attP2) fly line was obtained from Bloomington Stock Center;  
447 The *tim*-Gal4 transgenic line: yw; *cyo/tim*-Gal4 was obtained from Dr. Leslie Griffith's and Dr.  
448 Michael Rosbash's labs at Brandeis University. These two lines were crossed to obtain both UAS-  
449 *pum*<sup>RNAi</sup>/*tim*-Gal4 experimental flies and the "sibling" control flies UAS-*pum*<sup>RNAi</sup>/+. The Milord-1  
450 P{lacZ}<sup>pummilord-1</sup> was obtained from Dr. Josh Dubnau. The mutant *pum*<sup>13</sup> (*pum*<sup>680</sup>) and Canton S wild  
451 type flies were also obtained from Bloomington Stock Center and crossed to obtain both *pum*<sup>13</sup>/+ and  
452 *pum*<sup>13</sup>/*pum*<sup>13</sup> flies used in Figure 4.

453 **Sleep assays:** Sleep assays used 1-2 days old female flies. The individuals were collected, separated  
454 by phenotype and placed into controlled temperature for 6-7 days under 12h:12h light dark cycles for  
455 entrainment. The individuals were then anesthetized with CO<sub>2</sub> and placed in individual tubes  
456 containing fly food (5% sucrose, 2% agar). Tubes were then placed in *Drosophila* Activity Monitors  
457 (DAM) within an environmentally controlled incubator (26°C, 80% humidity, light intensity of 800  
458 lux) and connected to the monitoring system (TriKinetics, Waltham, MA) under 12h:12h light dark  
459 cycles. After 4-5 days of baseline recordings, after changing the fly food to avoid dryness and microbial  
460 growth, the different groups of flies were sleep deprived with the methods described below. The genetic  
461 controls ("siblings") were handled and tested side by side to the experimental flies. Flies with less than  
462 80% deprivation within the first 12 hrs were excluded from the analysis. Number of individuals tested  
463 and number of experiment replications depicted are stated in figure legends. A cumulative sleep lost  
464 plot was calculated for each individual by comparing the percentage of sleep lost during sleep  
465 deprivation to the average sleep of the non-deprived flies. The individual sleep recovery (rebound) was  
466 calculated by dividing the cumulative amount of sleep regained by the total amount of sleep lost during  
467 deprivation.

468

469 **Mechanical sleep deprivation:** Mechanical deprivation was performed using a commercially  
470 available *Drosophila* sleep deprivation apparatus (Trikinetics Inc., VMP Vortexer Mounting Plate).  
471 The apparatus was controlled by the Trikinetics software, shaking the monitors for 30 seconds on  
472 alternate settings of 4, 5 and 8 minutes to create an apparently random shaking pattern. The same  
473 pattern was used for all experiments. This set-up continued for 84 consecutive hours at the start of the  
474 first night for all chronic SD. For the acute SD experiment, the same set up was used but for only 12  
475 hours of the deprivation night. Although this protocol results in partial sleep deprivation, rather than  
476 total deprivation, it induces significant sleep lost, normally around 80%, and allows the flies to survive  
477 through the chronic sleep deprivation period. Due to the long SD time of 84 hours and the baseline

## ***Pumilio* regulates sleep homeostasis in response to chronic sleep deprivation in *Drosophila melanogaster***

478 period, we perform a fly food change the day before SD to avoid microbial growth and food dryness.  
479 This change is coordinated with the morning peak and performed simultaneously for all experimental  
480 groups.

481

482 **Statistical methods:** All statistical comparisons for significance between control and experimental  
483 groups was calculated using a significance cut off  $p < 0.05$ . All statistical analyses were performed  
484 using Graphpad Prism 8 software. Statistical analyses performed are included in the figure legends.

485

486 **Measurement of gene expression by qRT-PCR:** RNA was extracted from heads of adult flies using  
487 the Qiagen RNeasy Mini kit (Qiagen, Crawley, UK). Five heads were pooled to make one sample and  
488 homogenized with a plastic mortar in 100ul of lysis buffer containing 0.1 M-mercaptoethanol, then  
489 250 ul of lysis buffer was added and centrifuged. 350 ul of 70% ethanol was added and passed through  
490 a RNeasy column. After washing in buffer, immobilized nucleic acids were then treated with 190 U of  
491 DNase I for 15 min, washed again in stages according to manufacturer's protocol, and then eluted in  
492 20 ul of RNase-free water. Quantification of RNA concentration was made using a ND-1000 Nanodrop  
493 spectrophotometer (Nanodrop, Wilmington, DE). All extracted RNA samples were analyzed to assure  
494 quality using the Agilent Bioanalyzer, any samples showing signs of degradation were discarded. After  
495 adjusting for concentration, synthesis of cDNA was performed with the iScript Reverse transcription  
496 Supermix (Bio-Rad) as per manufacturer protocol. The mix was incubated at 25 °C for 5 min, then at  
497 42 °C for 30 min followed by 85 °C for 5 min to inactivate reverse transcription. From the total reaction  
498 volume of 20ul, 1 ul of cDNA was used for each PCR sample. All primers were obtained from  
499 Integrated DNA Technologies. An Eppendorf Mastercycler Thermal Cycler was used for the relative  
500 quantification of target mRNAs. Reactions contained 5 ul of Syber green (SYBR) (Invitrogen), 0.5 ul  
501 of each forward and reverse primer (both 10 mM), 3 ul of water, and 1 ul of cDNA. Cycling was as  
502 follows: initial denaturation of 15 sec at 95 °C, then 40 cycles of annealing for 60 sec. for all primer  
503 pairs used, extension at 65 °C for 1:20 min and melting curve generation at 95 °C. Each group of 7  
504 samples were tested in triplicate. Final mRNA levels were expressed as relative fold change normalized  
505 against *rp49* mRNA. The comparative cycle threshold (Ct) method (User Bulletin 2, 1997; Applied  
506 Biosystems, Foster City, CA) was used to analyze the data.

507

### **Conflicts of interest:**

508 The authors declare that the research was conducted in the absence of any commercial or financial  
509 relationships that could be construed as a potential conflict of interest.

511

### **Authors Contributions:**

513 J.L.A., N.R. and L.A.D. designed the study. J.A., N.R., C.J.P, J.O., R.N., M.F. and L.A.D. performed  
514 the experiments and data analysis. J.L.A, A.G.,N.F. and L.A.D. wrote/reviewed the manuscript.

515

### **Funding:**

517 This work has been partially supported by RISE grant # 5R25GM061151-12, the NSF REU-CRIB  
518 Program Grant 1156810, and the NIGMS 2 P20 GM103642 06 (Sub # 5747) to A.G. grant.



## ***Pumilio* regulates sleep homeostasis in response to chronic sleep deprivation in *Drosophila melanogaster***

519

### 520 **Acknowledgments:**

521 We thank Dr. Tugrul Giray, Dr. Adrianel Vazquez, Dr. Adrian Ovalos Dr. Manuel Giannioni, Hidequel  
522 Rodriguez, Bismark Madera, Gabriel Diaz, Maria del Mar Reyes, Franshesca Rivera, Alejandro  
523 Medina, Lizangelis Cueto, Melina Torres, Carlos Billini, Rosa Alers, Wilfredo Soto, Rubielis Serrano,  
524 Keila Velazquez, Marcelo Francia, Oto Mendez, Norelis Diaz and the students from the genetics lab  
525 at UPR-RP biol3350 for their support.

526

### 527 **Supplementary Information:**

528 **Fig S1:** Transgenic flies showed increased baseline sleep.

529 **Fig S2:** *Pum* knockdown shows reduced sleep recovery up to 96 hours after chronic sleep deprivation.

530 **Fig S3:** *Pum*<sup>RNAi</sup> acute and chronic SD time course from qRT-PCR flies confirmed acute SD  
531 differences in sleep rebound.

532 **Table S1:** Summary of PR-PCR results in relation to each marker's effect in neuronal excitability.

533

### 534 **References:**

535

536 Allada, R., Cirelli, C., Sehgal, A. (2017). Molecular mechanisms of sleep homeostasis in flies and  
537 mammals. *Cold Spring Harb Perspect Biol*. Doi10.1101/cshperspect.a027730.

538 Agosto, J., Choi, J., Parisky, K., Stilwell, G., Rosbash, M., Griffith, LC. (2008) Modulation of  
539 GABAA receptor desensitization uncouples sleep onset and maintenance in *Drosophila*. *Nature*  
540 *Neuroscience* 11(3):354.

541 Baines, R.A. (2003). Postsynaptic protein kinase A reduces neuronal excitability in response to  
542 increased synaptic excitation in the *Drosophila* CNS. *J Neurosci*. 23(25), 8664-72.

543 Brenes, O., Vandael, DH., Carbone, E., Montarolo, PG., Ghirardi, M. (2015). Knock-down of  
544 synapsin alters cell excitability and action potential waveform by potentiating BK and voltage-gated  
545 Ca(2+) currents in *Helix* serotonergic neurons. *Neuroscience*. Dec 17;311:430-43.

546 Brusich, DJ., Spring, AM., Frank, CA. (2015). A single-cross, RNA interference-based genetic tool  
547 for examining the long-term maintenance of homeostatic plasticity. *Front Cell Neurosci*. (9)107.

548 Bushey, Tononi G, Cirelli C. (2009). The *Drosophila* Fragile X Mental Retardation Gene Regulates  
549 Sleep Need. *The Journal of Neuroscience*. 29(7),1948 –1961.

550 Cao, Q., Padmanabhan, K., Richter, JD. (2009). *Pumilio* 2 controls translation by competing with  
551 eIF4E for 7-methyl guanosine cap recognition. *RNA*. 16(1), 221-7.

552 Cirelli, C., Bushey, D., Hill, S., Huber, R., Kreber, R., Ganetzky, B., et al. (2005). Reduced sleep in  
553 *Drosophila* Shaker mutants. *Nature*. 434, 1087-1092.

554 Cirelli, C., Tononi, G. (2008). Is Sleep Essential? *PLoS Biol* 6(8), e216.

***Pumilio* regulates sleep homeostasis in response to chronic sleep deprivation in *Drosophila melanogaster***

- 555 Chen, G., Li, W., Zhang, Q. S., Regulski, M., Sinha, N., Barditch, J., Tully, T., Krainer, A. R., et. al.  
556 (2008). Identification of synaptic targets of *Drosophila pumilio*. PLoS computational biology, 4(2).
- 557 Chiappalone, M., Casagrande, S., Tedesco, M., Valtorta, F., Baldelli, P., Martinoia, S., et al. (2009).  
558 Opposite changes in glutamatergic and GABAergic transmission underlie the diffuse  
559 hyperexcitability of synapsin I-deficient cortical networks. Cereb Cortex. 19(6),1422-39.
- 560 Chung, BY., Kilman, VL., Russel, KJ., Pitman, JL., Allada, R. (2009). The GABAA Receptor RDL  
561 Acts in Peptidergic PDF Neurons to Promote Sleep in *Drosophila*. Current Biology 19 (5).
- 562 Daan S, Beersma DG, Borbély AA. Timing of human sleep: recovery process gated by a circadian  
563 pacemaker. Am J Physiol. 1984 Feb;246(2 Pt 2):R161-83.
- 564 Donlea, JM., Thimgan, MS., Suzuki, Y., Gottschalk, L., Shaw, PJ. (2011). Inducing sleep by remote  
565 control facilitates memory consolidation in *Drosophila*. Science. 332(6037).
- 566 Koh, K., Joiner, W.J., Wu, M.N., Yue, Z., Smith, C.J., Sehgal, A. (2008). Identification of  
567 SLEEPLESS, a sleep-promoting factor. Science. Jul 18;321(5887).
- 568 Davis, GW. (2006). Homeostatic control of neural activity: from phenomenology to molecular  
569 design. Annu Rev Neurosci. 29, 307-23.
- 570 Davis, GW. (2013). Homeostatic Signaling and the Stabilization of Neural Function. Neuron. Oct 30;  
571 80(3).
- 572 Donlea, JM., Pimentel, D., Miesenböck, G. (2014). Neuronal Machinery of Sleep Homeostasis in  
573 *Drosophila*. Neuron. 81(4).
- 574 Donlea, JM. (2017). Neuronal and molecular mechanisms of sleep homeostasis. Current Opinion in  
575 Insect Science. 24, 51–57.
- 576 Driscoll, HE., Muraro, N.I., He, M., Baines, R.A. (2013). *Pumilio-2* regulates translation of Nav1.6  
577 to mediate homeostasis of membrane excitability. J Neurosci. 33(23), 9644-54.
- 578 Dubnau, J., Chiang, AS., Grady, L., Barditch, J., Gossweiler, S., McNeil, J., et al. (2003). The  
579 *staufen/pumilio* pathway is involved in *Drosophila* long-term memory. Curr Biol. 13, 286-96.
- 580 Feng, G., Zhang, J., Li, M., Shao, L., Yang, L., Song, Q., Ping, Y. (2018). Control of Sleep Onset by  
581 *Shal/Kv4* Channels in *Drosophila* Circadian Neurons. J Neurosci. Oct 17;38(42):9059-9071.
- 582 Fiore, R., Rajman, M., Schwale, C., Bicker, S., Antoniou, A., Bruehl, C., et al. (2014). MiR-134-  
583 dependent regulation of *Pumilio-2* is necessary for homeostatic synaptic depression. EMBO J.  
584 33(19), 2231-46.
- 585 Gerber, A. P., Luschnig, S., Krasnow, M. A., Brown, P. O., & Herschlag, D. (2006). Genome-wide  
586 identification of mRNAs associated with the translational regulator PUMILIO in *Drosophila*  
587 *melanogaster*. Proceedings of the National Academy of Sciences of the United States of America,  
588 103(12), 4487-92.

***Pumilio* regulates sleep homeostasis in response to chronic sleep deprivation in *Drosophila melanogaster***

- 589 Ghezzi, A., Atkinson, NS. (2011). Homeostatic control of neural activity: a *Drosophila* model for  
590 drug tolerance and dependence. *Int Rev Neurobiol.* 99, 23-50.
- 591 Gilestro, GF., Tononi, G., Cirelli, C. 2009. Widespread changes in synaptic markers as a function of  
592 sleep and wakefulness in *Drosophila*. *Science.* Apr 3;324(5923):109-12.
- 593 Gitler D, Cheng Q, Greengard P, Augustine GJ.(2008). Synapsin IIa controls the reserve pool of  
594 glutamatergic synaptic vesicles. *J Neurosci.* Oct 22;28(43):10835-43.
- 595 Grønli, J., Soulé, J., Bramham, CR. (2014). Sleep and protein synthesis-dependent synaptic  
596 plasticity: impacts of sleep loss and stress. *Front Behav Neurosci.* 7, 224.
- 597 Hamanaka, Y; Wegener, C; Nasser, DR. (2005). GABA modulates *Drosophila* circadian clock  
598 neurons via GABAB receptors and decreases in calcium. *Journal of Neurobiology,* 65(3):225-240.
- 599 Hendricks, JC., Sehgal, A., Pack, AI. (2000). The need for a simple animal model to understand  
600 sleep. *Prog Neurobiol.* 61(4), 339-51.
- 601 Howlett, E., Lin, CC., Lavery, W., Stern, M. (2008). A PI3-kinase-mediated negative feedback  
602 regulates neuronal excitability. *PLoS Genet.* Nov;4(11).
- 603 Hu, JH., Park, JM., Park, S., Xiao, B., Dehoff, MH., Kim, S., et al. (2010). Homeostatic scaling  
604 requires group I mGluR activation mediated by Homer1a. *Neuron.* 68(6),1128-42.
- 605 Huber R, Hill SL, Holladay C, Biesiadecki M, Tononi G, Cirelli C. (2004). Sleep homeostasis in  
606 *Drosophila melanogaster*. *Jun 15;27(4):628-39.*
- 607 Jepson, J., Sheldon, A., Shahidullah, M., Fei, H., Koh, K., Levitan, IB. (2013) Cell-specific fine-  
608 tuning of neuronal excitability by differential expression of modulator protein isoforms. *J Neurosci.*  
609 *Oct 16;33(42):16767-77.*
- 610 Kaneko, M., Hall, JC (2000) Neuroanatomy of cells expressing clock genes in *Drosophila*: transgenic  
611 manipulation of the period and timeless genes to mark the perikarya of circadian pacemaker neurons  
612 and their projections. *J Comp Neurol* 422, 66-94.
- 613 Kim, Y., Laposky, AD., Bergmann, BM., Turek, FW. (2007). Repeated sleep restriction in rats leads  
614 to homeostatic and allostatic responses during recovery sleep. *Proc Natl Acad Sci U S A.*  
615 *104(25),10697-702.*
- 616 Kim, Y., Chen, L., McCarley, RW., Strecker, RE. (2013). Sleep allostasis in chronic sleep restriction:  
617 the role of the norepinephrine system. *Brain Res.* 1531, 9-16.
- 618 Kittel, RJ., Wichmann, C., Rasse, TM., Fouquet, W., Schmidt, M., Schmid, A., et al. (2006).  
619 *Bruchpilot* promotes active zone assembly, Ca<sup>2+</sup> channel clustering, and vesicle release. *Science.*  
620 *312(5776),1051-4.*
- 621 Kula-Eversole, E., Nagoshi, E., Shang, Y., Rodriguez, J., Allada, R., Rosbash, M. (2010). Surprising  
622 gene expression patterns within and between PDF-containing circadian neurons in *Drosophila*. *Proc*  
623 *Natl Acad Sci USA.* 107, 13497-13502.

***Pumilio* regulates sleep homeostasis in response to chronic sleep deprivation in *Drosophila melanogaster***

- 624 Lee, CC., Huang, CC., Hsu, KS. (2011). Insulin promotes dendritic spine and synapse formation by  
625 the PI3K/Akt/mTOR and Rac1 signaling pathways. *Neuropharmacology*. 61(4), 867-79.
- 626 Lee, D., Su, H., O'Dowd DK. (2003). GABA receptors containing Rdl subunits mediate fast  
627 inhibitory synaptic transmission in *Drosophila* neurons. *J Neurosci*. 23(11), 4625–4634.
- 628 Leemburg, S., Vyazovskiy, VV., Olcese, U., Bassetti, CL., Tononi, G., Cirelli, C. (2010). Sleep  
629 homeostasis in the rat is preserved during chronic sleep restriction. *Proc Natl Acad Sci U S A*.  
630 107(36),15939-44.
- 631 Li, X., Overton, IM., Baines, RA., Keegan, LP., O'Connell, MA. (2014). The ADAR RNA editing  
632 enzyme controls neuronal excitability in *Drosophila melanogaster*. *Nucleic Acids Res*. 42(2):1139-  
633 51.
- 634 Liu, S., Liu, Q., Tabuchi, M., Wu, MN. (2016). Sleep drive is encoded by neural plastic changes in a  
635 dedicated circuit. *Cell* 165 (6).
- 636 Marder, E., Prinz, AA. (2003). Current compensation in neuronal homeostasis. *Neuron*. 37(1).
- 637 Mee, CJ., Pym, EC., Moffat, KG., Baines, RA. (2004). Regulation of neuronal excitability through  
638 *pumilio*-dependent control of a sodium channel gene. *J Neurosci*. 24, 8695-703.
- 639 Menon, KP., Sanyal, S., Habara, Y., Sanchez, R., Wharton, RP., Ramaswami, M., et al. (2004). The  
640 translational repressor *Pumilio* regulates presynaptic morphology and controls postsynaptic  
641 accumulation of translation factor eIF-4E. *Neuron*. 44(4), 663-76.
- 642 Miron, M., Lasko, P., Sonenberg N. 2003. Signaling from Akt to FRAP/TOR targets both 4E-BP and  
643 S6K in *Drosophila melanogaster*. *Mol Cell Biol*. Dec;23(24):9117-26.
- 644 Muraro, NI., Weston, AJ., Gerber, AP., Luschnig, S., Moffat, KG., Baines, RA. (2008). *Pumilio*  
645 binds *para* mRNA and requires Nanos and Brat to regulate sodium current in *Drosophila*  
646 motoneurons. *J Neurosci*. 28, 2099-109.
- 647 Naidoo, N., Ferber, M., Galante, RJ., McShane, B., Hu, JH., Zimmerman, J., et al. (2012). Role of  
648 Homer proteins in the maintenance of sleep-wake states. *PLoS One*. 7, 4.
- 649 Nitz, DA., van Swinderen, B., Tononi, G., Greenspan, RJ. (2002). Electrophysiological correlates of  
650 rest and activity in *Drosophila melanogaster*. *Curr Biol*. 12(22),1934-40.
- 651 Ottosson, NE., Wu, X., Nolting, A., Karlsson, U., Lund, PE., Ruda, K., et al. (2015). Resin-acid  
652 derivatives as potent electrostatic openers of voltage-gated K channels and suppressors of neuronal  
653 excitability. *Scientific Reports*. 5(13278).
- 654 Papale, LA., Paul, KN., Sawyer, NT., Manns, JR., Tufik, S., Escayg, A. (2010). Dysfunction of the  
655 *Scn8a* voltage-gated sodium channel alters sleep architecture, reduces diurnal corticosterone levels,  
656 and enhances spatial memory. *J Biol Chem*. 285,(22).
- 657 Parisky, KM., Agosto, J., Pulver, SR., Shang, Y., Kuklin, E., Hodge, J., et al. (2009). PDF Cells Are  
658 a GABA-Responsive Wake-Promoting Component of the *Drosophila* Sleep Circuit. *Neuron* 61(1).



***Pumilio* regulates sleep homeostasis in response to chronic sleep deprivation in *Drosophila melanogaster***

- 659 Parrish, JZ., Kim, CC., Tang, L., Bergquist, S., Wang, T., Derisi, JL., et al. (2014). Krüppel mediates  
660 the selective rebalancing of ion channel expression Neuron. 82(3), 537-44.
- 661 Penney, J., Tsurudome, K., Liao, EH., Elazzouzi, F., Livingstone, M., Gonzalez, M., et al. (2012).  
662 TOR is required for the retrograde regulation of synaptic homeostasis at the *Drosophila*  
663 neuromuscular junction. Neuron. 74(1),166-78.
- 664 Pfeiffenberger, C., Allada, R. (2012). Cul3 and the BTB Adaptor Insomniac Are Key Regulators of  
665 Sleep Homeostasis and a Dopamine Arousal Pathway in *Drosophila*. PLoS Genet 8(10).
- 666 Pimentel, D., Donlea, JM., Talbot, CB., Song, SM., Thurston, AJF. Miesenböck G. (2016). Operation  
667 of a homeostatic sleep switch. Nature. 536, 333-337.
- 668 Ping, Y., Waro, G., Licursi, A., Smith, S., Vo-Ba, DA., Tsunoda, S. (2011). Shal/K(v)4 channels are  
669 required for maintaining excitability during repetitive firing and normal locomotion in *Drosophila*.  
670 PLoS One. Jan 17;6(1)
- 671 Pozo, K., Goda, Y. (2010). Unraveling mechanisms of homeostatic synaptic plasticity. Neuron.  
672 66(3), 337-51.
- 673 Prange, O., Wong, TP., Gerrow, K., Wang, YT., El-Husseini, A. (2004). A balance between  
674 excitatory and inhibitory synapses is controlled by PSD-95 and neuroligin. Proc Natl Acad Sci U S  
675 A. 101(38),13915-20.
- 676 Sehgal, A., Joiner, W., Crocker, A., et al. (2007). Molecular Analysis of Sleep: Wake Cycles in  
677 *Drosophila*. Cold Spring Harb Symp Quant Biol . 72, 557-564.
- 678 Seidner, G., Robinson, J., Wu, M., Roberts, SW., Keene, AC., Joiner, WJ. (2015). Identification of  
679 Neurons with a Privileged Role in Sleep Homeostasis in *Drosophila Melanogaster* Current Biology.  
680 25(22): 2928-38.
- 681 Siegel, JM. (2008). Do all animals sleep? Trends Neurosci. 31(4), 208-13. Shaw, PJ., Cirelli, C.,  
682 Greenspan, RJ, Tononi, G. (2000). Correlates of sleep and waking in *Drosophila melanogaster*.  
683 Science 287, 1834-1837.
- 684 Shaw, PJ., Tononi, G., Greenspan, RJ., Robinson, DF.(2002). Stress response genes protect against  
685 lethal effects of sleep deprivation in *Drosophila*. Nature. May 16;417(6886):287-91
- 686 Sitaraman, D., Aso, Y., Jin, X., Chen, N., Felix, M., Rubin, GM., Nitabach, MN. (2015). Propagation  
687 of homeostatic sleep signals by segregated synaptic microcircuits of the *Drosophila* mushroom body.  
688 Curr Biol. 25(22).
- 689 Thimgan, MS., Gottschalk, L., Toedebusch, C., McLeland, J., Rechtschaffen, A., et al. (2013). Cross-  
690 translational studies in human and *Drosophila* identify markers of sleep loss. PLoS One 8 (4), e61016
- 691 Tobler, I., Achermann, P. (2007). Sleep Homeostasis. Scholarpedia, 2(10), 2432.
- 692 Turrigiano, GG., Nelson, SB. (2004). Homeostatic plasticity in the developing nervous system. Nat  
693 Rev Neurosci. 5(2), 97-107.

***Pumilio* regulates sleep homeostasis in response to chronic sleep deprivation in *Drosophila melanogaster***

- 694 Turrigiano, GG. (2008). The self-tuning neuron: synaptic scaling of excitatory synapses. *Cell*. 135,  
695 422-35.
- 696 Turrigiano, GG. (2012). Homeostatic synaptic plasticity: local and global mechanisms for stabilizing  
697 neuronal function. *Cold Spring Harb Perspect Biol*. 4(1).
- 698 Van Swinderen, B., Nitz, DA., Greenspan, RJ. (2004). Uncoupling of brain activity from movement  
699 defines arousal States in *Drosophila*. *Curr Biol*. 14(2), 81-7.
- 700 Vessey, JP., Vaccani, A., Xie, Y., Dahm, R., Karra, D., Kiebler, MA., et al. (2006). Dendritic  
701 localization of the translational repressor Pumilio 2 and its contribution to dendritic stress granules. *J*  
702 *Neurosci*. 26(24), 6496-508.
- 703 Vessey JP, Schoderboeck L, Gingl E, Luzi E, Riefler J, Di Leva F, Karra D, Thomas S, Kiebler MA,  
704 Macchi P. (2008). Mammalian Pumilio 2 regulates dendrite morphogenesis and synaptic function.  
705 *Proc Natl Acad Sci U S A*. 2010 Feb 16;107(7):3222-7.
- 706 Vyazovskiy, VV., Olcese, U., Lazimy, YM., Faraguna, U., Esser, S., Cirelli, C., et al. (2009).  
707 Cortical Firing and Sleep Homeostasis. *Neuron*. 63(6),865-78.
- 708 Wang, M.; Ogé, L.; Perez-Garcia, M.D.; Hamama, L.; Sakr, S. (2018). The PUF Protein Family:  
709 Overview on PUF RNA Targets, Biological Functions, and Post Transcriptional Regulation. *Int. J.*  
710 *Mol. Sci*. 19(2).
- 711 Wharton, RP., Sonoda, J., Lee, T., Patterson, M., Yoshihiko, M. (1998). The Pumilio RNA-Binding  
712 Domain Is Also a Translational Regulator. *Molecular Cell*. 1(6).
- 713 Weston, AJ., Baines, RA. (2007). Translational regulation of neuronal electrical properties. *Invert*  
714 *Neurosci*. 7(2), 75-86.
- 715 Wu, M., Robinson, JE., Joiner, WJ. (2014). SLEEPLESS is a bifunctional regulator of excitability  
716 and cholinergic synaptic transmission. *Curr Biol*. 24(6), 621-9.
- 717 Yang JJ, Wang YT, Cheng PC, Kuo YJ, Huang RC. 2010. Cholinergic modulation of neuronal  
718 excitability in the rat suprachiasmatic nucleus. *J Neurophysiol*. 2010 Mar;103(3):1397-409.
- 719 Ye, B., Petritsch, C., Clark, IE., Gavis, ER., Jan, LY., Jan, YN. (2004). Nanos and pumilio Are  
720 Essential for Dendrite Morphogenesis in *Drosophila* Peripheral Neurons. *Current Biology*.14(4),  
721 314–321.
- 722
- 723 **Figure 1: *Pum* knockdown eliminates sleep recovery after chronic mechanical sleep deprivation.**  
724 Sleep comparison of UAS-*pum*<sup>RNAi</sup>/*tim*-Gal4 (experimental) vs *tim*-Gal4/+ (parental) flies and UAS-  
725 *pum*<sup>RNAi</sup>/*tim*-Gal4/+ (“sibling” controls) during chronic SD. The X axis indicates time after start of sleep  
726 deprivation. (A-C) Depiction of sleep activity during the sleep deprivation and sleep rebound period  
727 for all genotypes. (D) Cumulative sleep lost during deprivation expressed as a percentage of total sleep  
728 in non-deprived flies of the same genotype. Two-way ANOVA using “genotype” as a factor and “time”  
729 as a repeated measure showed significant differences in genotypes (F (2, 132) = 11.24 P<0.0001), time  
730 (F (167, 22044) = 1033 P<0.0001) and interaction (F(334, 22044) = 3.066, P<0.0001). Post-hoc

## ***Pumilio* regulates sleep homeostasis in response to chronic sleep deprivation in *Drosophila melanogaster***

731 analysis using Dunnett's multiple comparisons test showed significant differences between *UAS-*  
732 *pum*<sup>RNAi</sup>/*tim*-Gal4 vs *tim*-Gal4/+ flies (P<0.0001). (E) Percent sleep recovery after SD. Two-Way  
733 ANOVA with repeat measures indicated significant differences in genotypes (F (2, 132) = 18.58  
734 P<0.0001) and interaction (F (94, 6204) = 13.73 P<0.0001). Post-hoc analysis using Sidak's multiple  
735 comparisons test comparing both control genotypes against experimental flies, revealed significant  
736 differences (P<0.0001) between *UAS-pum*<sup>RNAi</sup>/*tim*-Gal4 vs *tim*-Gal4/+ flies and *UAS-pum*<sup>RNAi</sup>/  
737 throughout the recovery period. The data shown represents two experiments with the following sample  
738 sizes (N): *tim*-Gal4/+ Non-Deprived (N=56) and Deprived (N=53); *UAS-pum*<sup>RNAi</sup>/  
739 (N=60) and Deprived (N=35); *UAS-pum*<sup>RNAi</sup>/  
740 (N=63) and Deprived (N=39). Because  
741 the calculations of sleep lost and sleep recovery involve both the Non-Deprived and Deprived groups  
742 (see methods), the N for panels A and B is equal to the N of the Deprived group. SD. Data points and  
743 error bars represent means ± SEM. Stars indicate significance level (\* denotes p<0.05; \*\* p< 0.01; \*\*\*  
p< 0.001; \*\*\*\* p< 0.0001).

744 **Figure 2: *Pum* knockdown differentially reduces sleep recovery in acute vs chronic SD.** Sleep  
745 comparison of *UAS-pum*<sup>RNAi</sup>/*tim*-Gal4 (experimental) vs *UAS-pum*<sup>RNAi</sup>/  
746 acute (12 hours) mechanical SD. The X axis indicates time after sleep deprivation. (A-B) Depiction of  
747 sleep activity during the sleep deprivation and sleep rebound period for both genotypes during acute  
748 SD. (C-D) Depiction of the sleep activity during sleep deprivation and sleep rebound period for both  
749 genotypes during hours 72 to 96 of chronic mechanical SD included for ease of comparison. The y-  
750 axis shows the number of minutes that flies slept in intervals of 30 min. (E) Cumulative sleep lost  
751 during deprivation expressed as a percentage of total sleep in non-deprived flies of the same genotype.  
752 Two-way ANOVA, using "genotype" as a factor and "time" as a repeated measure, did not showed  
753 significant differences between the genotypes (P=0.8664). (F) Percent sleep recovery after SD. Two-  
754 Way ANOVA with repeat measures indicated significant difference in genotypes (F (1, 58) = 7.114,  
755 P<0.0099) and interaction (F (23, 1334) = 3.054, P<0.0001). (G) Percent difference in rebound  
756 between deprived and non-deprived flies after acute and chronic sleep deprivation protocols of *UAS-*  
757 *pum*<sup>RNAi</sup>/  
758 and *UAS-pum*<sup>RNAi</sup>/*tim*-Gal4 flies. Two-way ANOVA with repeated measures showed a  
759 significant difference in genotype (F (1, 91) = 13.72, P=0.0004) and time vs genotype interaction (F  
760 (2, 106) = 13.97, P<0.0001). Post-hoc analysis using Tukey's multiple comparisons test revealed  
761 significant differences between *UAS-pum*<sup>RNAi</sup>/  
762 (N=31) and Deprived (N=32); *UAS-pum*<sup>RNAi</sup>/*tim*-Gal4 Non-Deprived (N=31) and Deprived (N=28). Because the  
763 calculations of sleep lost and sleep recovery involve both the Non-Deprived and Deprived groups (see  
764 methods), the N for panels A and B is equal to the N of the Deprived group. Data points and error bars  
765 represent means ± SEM. Stars indicate significance level (\* denotes p<0.05; \*\* p< 0.01; \*\*\* p< 0.001;  
766 \*\*\*\* p< 0.0001).

768

769 **Figure 3: *Pum* knockdown results in differential expression patterns between acute (12 hours)**  
770 **and chronic (84 hours) sleep deprivation.** Gene expression comparison of *UAS-pum*<sup>RNAi</sup>/  
771 ("sibling" controls) vs *UAS-pum*<sup>RNAi</sup>/*tim*-Gal4 (experimental) subjected to acute (12 hours) mechanical  
772 SD vs chronic SD. (A) Baseline gene expression in non-deprived flies from both genotypes. (B-E)  
773 Time-course plots for non-deprived, acutely deprived and chronically deprived flies showing  
774 expression changes during acute deprivation. The fold change is expressed in log scale. (F-J) Time-  
775 course plots for non-deprived, acutely deprived and chronically deprived flies showing expression

## ***Pumilio* regulates sleep homeostasis in response to chronic sleep deprivation in *Drosophila melanogaster***

776 changes during chronic SD. The fold change is expressed in log scale. Data points and error bars  
777 represent means  $\pm$  SEM. Two-way Analysis of variance (ANOVA) with repeated measures revealed  
778 significant effects due to *pum*, Time (T=0, T=12, T=84 hrs SD) and interactions between the  
779 parameters in some of the groups (see graphs for results). Stars indicate significance level (\* denotes  
780  $p < 0.05$ ; \*\*  $p < 0.01$ ; \*\*\*  $p < 0.001$ ; \*\*\*\*  $p < 0.0001$ ).

781

782 **Figure 4: *Pum*<sup>13</sup> mutant show reduced sleep rebound after chronic SD.** Sleep comparison of wild  
783 type, heterozygous and homozygous flies for the *pum*<sup>13</sup> allele. (A-C) Depiction of sleep activity during  
784 the sleep deprivation and sleep rebound period for all genotypes. The X axis indicates time after the  
785 start of the sleep deprivation protocol. The y-axis shows the number of minutes that flies slept in  
786 intervals of 30 min. (D) Cumulative sleep lost during deprivation expressed as a percentage of total  
787 sleep in non-deprived flies of the same genotype. Two-way ANOVA, using “genotype” as a factor and  
788 “time” as a repeated measure, did not show significant differences between the genotypes  $F(2, 63) =$   
789  $0.3635$ ,  $P = 0.6967$ . (E) Percent sleep recovery after SD. Two-Way ANOVA with repeat measures  
790 indicated significant difference in genotypes ( $F(2, 63) = 11.29$   $P < 0.0001$ ) and interaction ( $F(46, 1449)$   
791  $= 5.667$   $P < 0.0001$ ). Post-hoc analysis using Uncorrected Fisher's LSD comparisons test comparing all  
792 genotypes against *pum*<sup>13</sup>/*pum*<sup>13</sup> flies revealed significant differences with *pum*<sup>13</sup>/+ flies ( $P = 0.0319$ ) and  
793 with *pum*<sup>13</sup>/*pum*<sup>13</sup> ( $P < 0.0001$ ). The comparison between *pum*<sup>13</sup>/+ and *pum*<sup>13</sup>/*pum*<sup>13</sup> show no difference  
794 ( $P = 0.0728$ ). The data shown represents one experiment with the following sample sizes (N): 1) Canton-  
795 S (+/+), Non-Deprived (N=30) and Deprived (N=17); *pum*<sup>13</sup>/+, Non-Deprived (N=28) and Deprived  
796 (N=28); *pum*<sup>13</sup>/*pum*<sup>13</sup>, Non-Deprived (N=30) and Deprived (N=22). Because the calculations of sleep  
797 lost and sleep recovery involve both the Non-Deprived and Deprived groups (see methods), the N for  
798 panels A and B is equal to the N of the Deprived group. Data points and error bars represent means  $\pm$   
799 SEM. Stars indicate significance level (\* denotes  $p < 0.05$ ; \*\*  $p < 0.01$ ; \*\*\*  $p < 0.001$ ; \*\*\*\*  $p < 0.0001$ ).

800 **Figure 5: The Milord-1 fly line shows reduced sleep rebound after chronic SD.** Sleep comparison  
801 of wild type and Milord-1 flies. (A-B) Depiction of sleep activity during the sleep deprivation and sleep  
802 rebound period for all genotypes. The X axis indicates time after the start of the sleep deprivation  
803 protocol. The y-axis shows the number of minutes that flies slept in intervals of 30 min. (C) Cumulative  
804 sleep lost during deprivation expressed as a percentage of total sleep in non-deprived flies of the same  
805 genotype. Two-way ANOVA using “genotype” as a factor and “time” as a repeated measure showed  
806 no significant differences between the genotypes ( $F(1, 58) = 3.712$ ,  $P = 0.0589$ ). (D) Percent sleep  
807 recovery after SD. Two-Way ANOVA with repeat measures indicated significant difference in  
808 genotypes ( $F(1, 58) = 5.193$   $P = 0.0264$ ) and interaction ( $F(23, 1334) = 1.695$   $P < 0.0213$ ). The data  
809 shown represents two experiments with the following sample sizes (N): Canton-S (+/+) Non-Deprived  
810 (N=30) and Deprived (N=17); Milord-1 Non-Deprived (N=62) and Deprived (N=45). Because the  
811 calculations of sleep lost and sleep recovery involve both the Non-Deprived and Deprived groups (see  
812 methods), the N for panels A and B is equal to the N of the Deprived group. Data points and error bars  
813 represent means  $\pm$  SEM. Stars indicate significance level (\* denotes  $p < 0.05$ ; \*\*  $p < 0.01$ ; \*\*\*  $p < 0.001$ ;  
814 \*\*\*\*  $p < 0.0001$ ).

815

816 **Figure S1: Transgenic flies showed increased baseline sleep.** (A) Graphs showing the average sleep  
817 activity for UAS-*pum*<sup>RNAi</sup>/+ (“sibling” control) and UAS-*pum*<sup>RNAi</sup>/*tim*-Gal4 under baseline sleep  
818 conditions compared to parental *tim*-Gal4/+ baseline. The y-axis shows the number of minutes that  
819 flies slept in intervals of 30 min. (B) Graph showing baseline sleep for all *pum*<sup>13</sup> lines. (C) Graph



## *Pumilio* regulates sleep homeostasis in response to chronic sleep deprivation in *Drosophila melanogaster*

820 showing baseline sleep for Milord-1 line. Stars indicate significance level (\* denotes  $p < 0.05$ ; \*\*  $p <$   
821  $0.01$ ; \*\*\*  $p < 0.001$ ; \*\*\*\*  $p < 0.0001$ ).

822

823 **Figure S2: *Pum* knockdown shows reduced sleep recovery up to 96 hours after chronic sleep**  
824 **deprivation.** Sleep comparison of *UAS-pum<sup>RNAi</sup>/tim-Gal4* (experimental) vs *UAS-pum<sup>RNAi</sup>/+*  
825 (“sibling” controls) for the period following chronic SD. (A-B) Depiction of sleep activity during the  
826 recovery period for both genotypes after chronic mechanical SD. (C) Extended percent sleep recovery  
827 after SD. Graph depicting up to 108 hours of sleep recovery after chronic SD. Two-Way ANOVA with  
828 repeat measures indicated significant differences between the genotypes ( $F(1, 80) = 18.1$   $P < 0.0001$ )  
829 and interaction ( $F(167, 13360) = 8.362$   $P < 0.0001$ ). Post-hoc analysis using Tukey’s multiple  
830 comparisons test revealed significant differences between *UAS-pum<sup>RNAi</sup>/tim-Gal4* throughout the  
831 recovery period. The y-axis shows the number of minutes that flies slept in intervals of 30min. The  
832 data shown represents two experiments with the following sample sizes (N): *UAS-pum<sup>RNAi</sup>/+* Non-  
833 Deprived (N=60) and Deprived (N=39); *UAS-pum<sup>RNAi</sup>/tim-Gal4* Non-Deprived (N=63) and Deprived  
834 (N=43). Because the calculations of sleep lost and sleep recovery involve both the Non-Deprived and  
835 Deprived groups (see methods), the N for panels A and B is equal to the N of the Deprived group. The  
836 y-axis shows the number of minutes that flies slept in intervals of 30min. Stars indicate significance  
837 level (\* denotes  $p < 0.05$ ; \*\*  $p < 0.01$ ; \*\*\*  $p < 0.001$ ; \*\*\*\*  $p < 0.0001$ ).

838

839 **Figure S3: *Pum<sup>RNAi</sup>* acute SD time course from qRT-PCR flies confirmed acute SD differences**  
840 **in sleep rebound** Sleep comparison of *UAS-pum<sup>RNAi</sup>/tim-Gal4* (experimental) vs *UAS-pum<sup>RNAi</sup>/+*  
841 (“sibling” controls) during acute and chronic SD. Flies were removed from the monitors after two  
842 hours of sleep recovery and immediately freeze for qRT-PCR analysis. (A,C) Depiction of the acute  
843 sleep deprivation and sleep rebound period for both genotypes. The y-axis shows the number of  
844 minutes that flies slept in intervals of 30 min. The data shown represents one experiment with the  
845 following sample sizes (N): *UAS-pum<sup>RNAi</sup>/+* Non-Deprived (N=31) and Deprived (N=27); *UAS-*  
846 *pum<sup>RNAi</sup>/tim-Gal4* Non-Deprived (N=31) and Deprived (N=32). (B,D) Depiction of the sleep  
847 deprivation period and sleep rebound pattern for *tim-Gal4/+* (parental) flies, *UAS-pum<sup>RNAi</sup>/+* (sibling)  
848 and *UAS-pum<sup>RNAi</sup>/tim-Gal4* exposed to chronic (84hrs) mechanical SD. The data shown represents two  
849 experiments with the following sample sizes (N): *UAS-pum<sup>RNAi</sup>/+* Non-Deprived (N=62) and  
850 Deprived (N=34); *UAS-pum<sup>RNAi</sup>/tim-Gal4* Non-Deprived (N=61) and Deprived (N=54). Error bars  
851 represent means  $\pm$  SEM.

**A**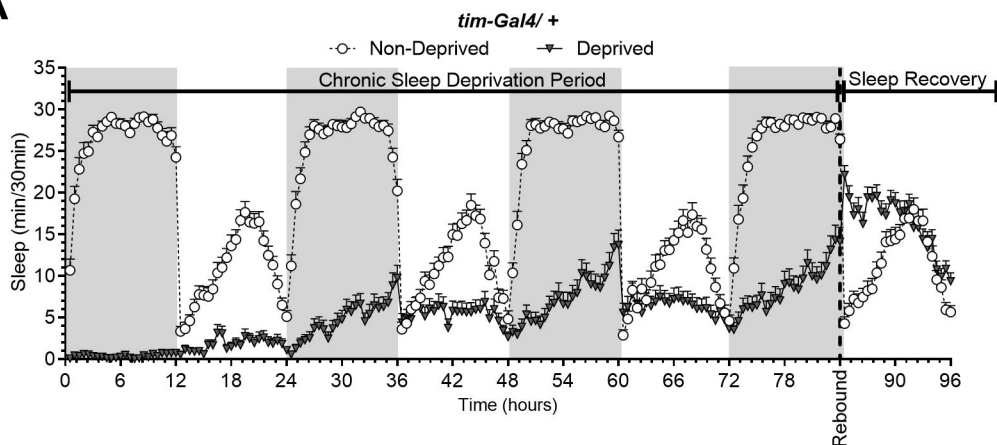**B**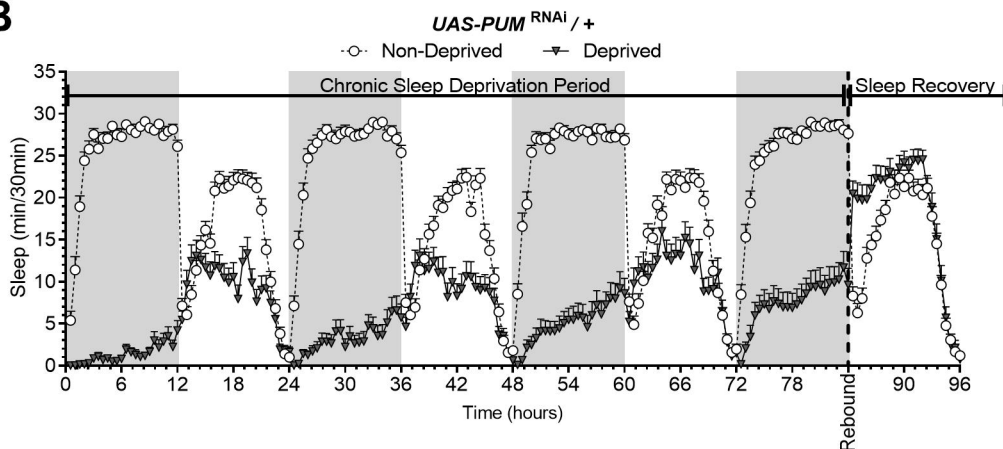**C**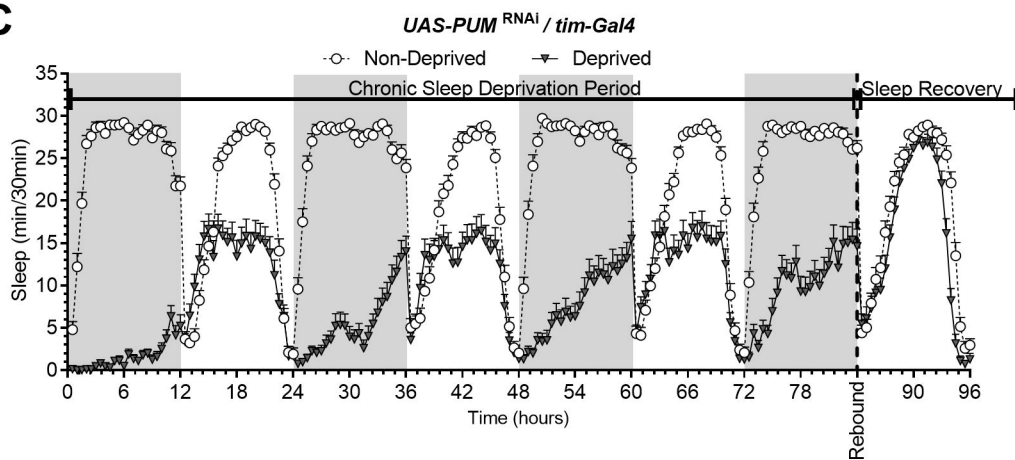**D**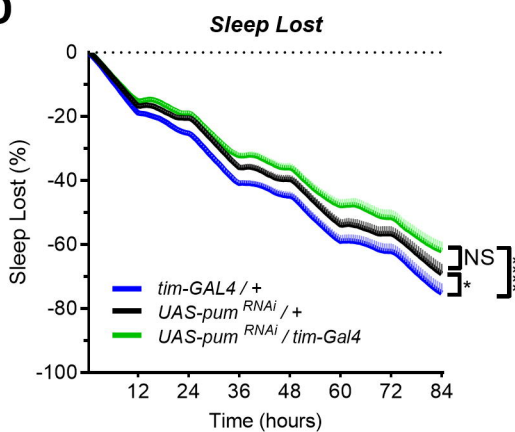**E**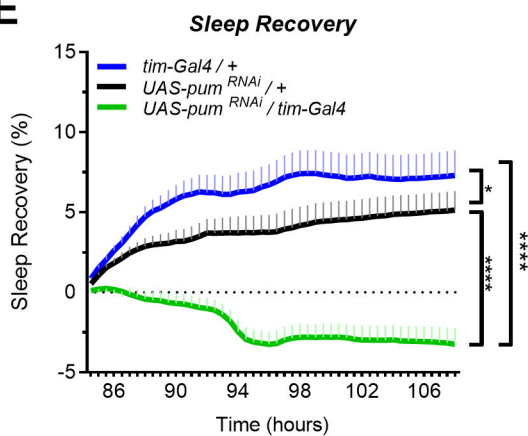

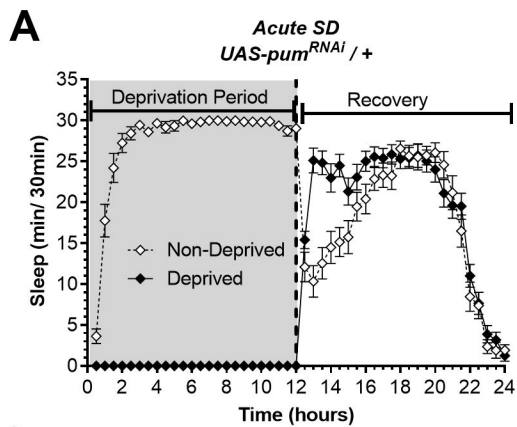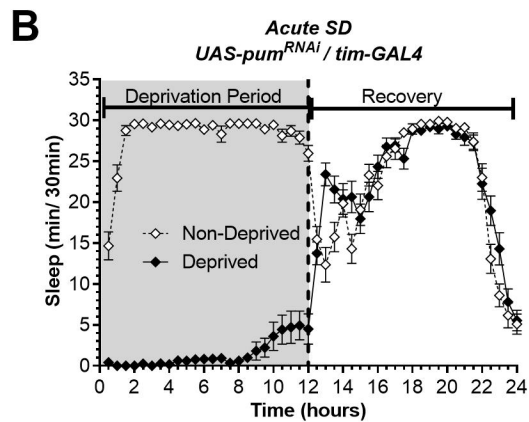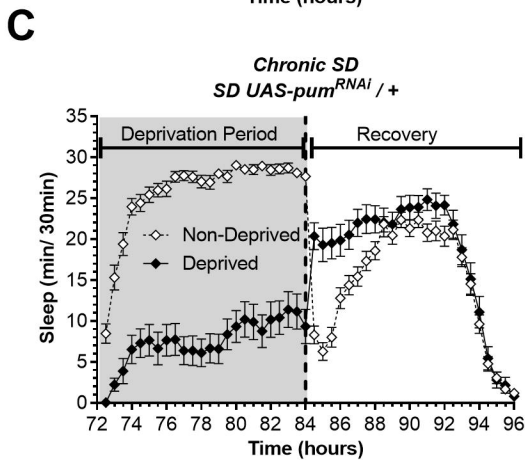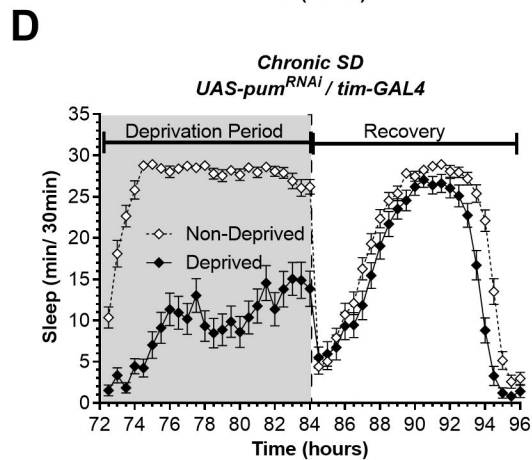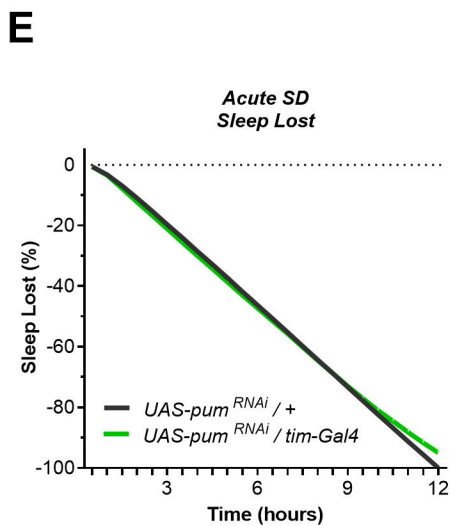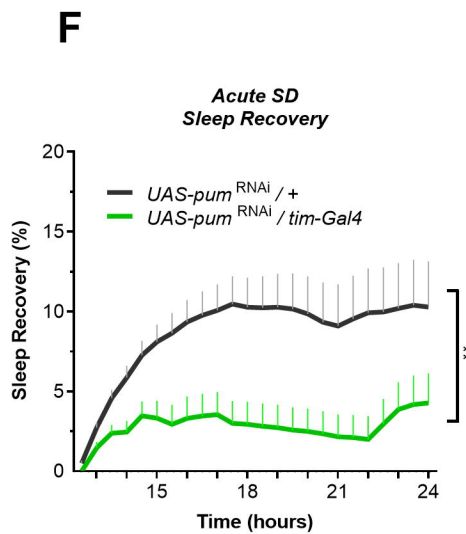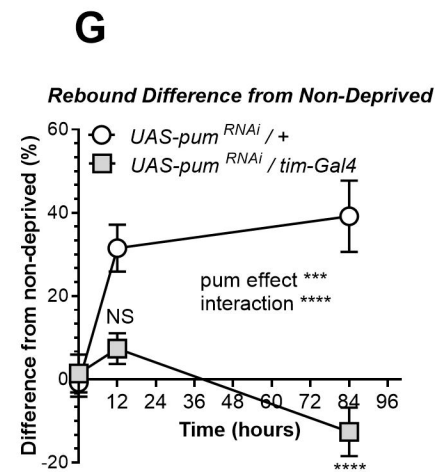

—

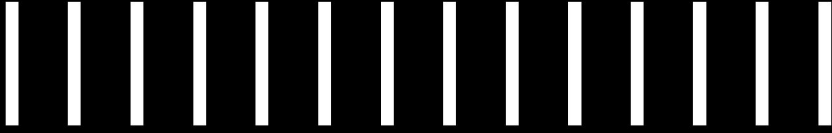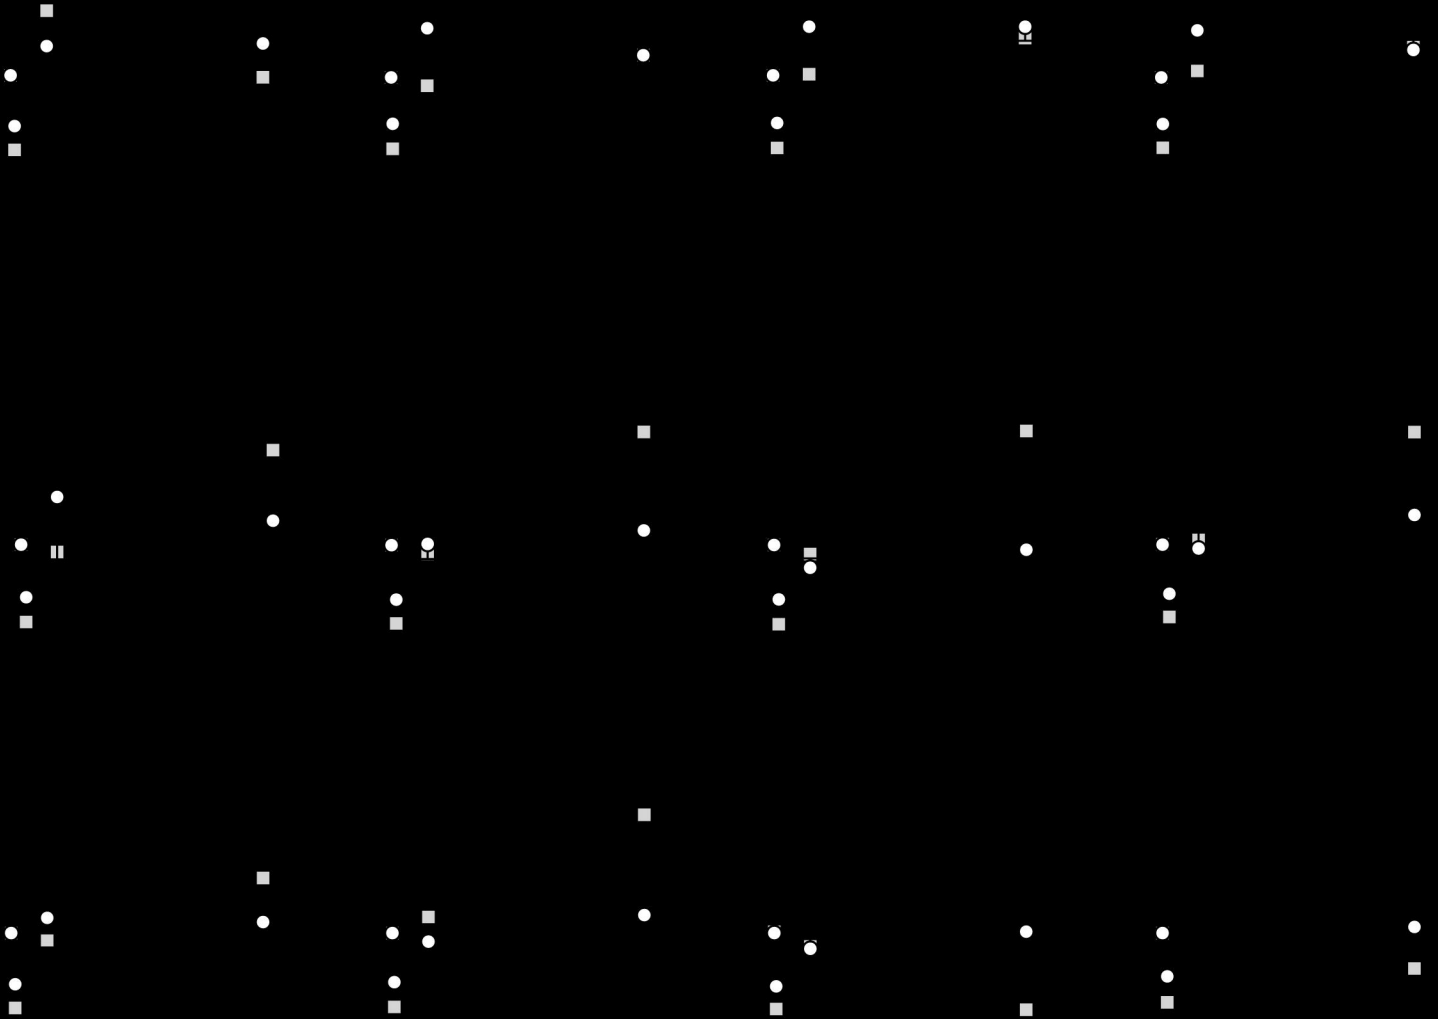



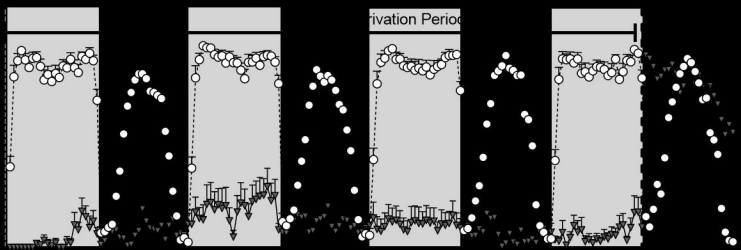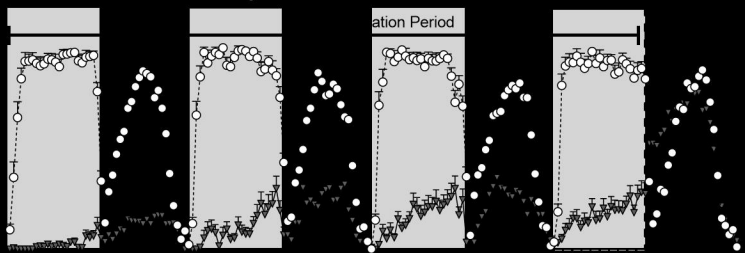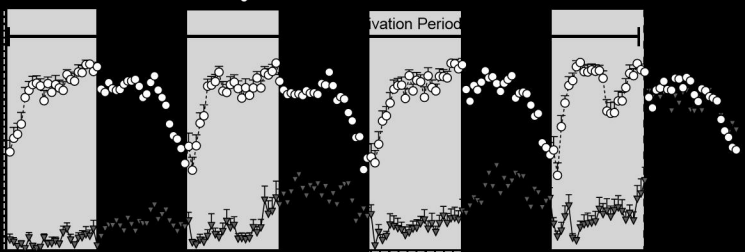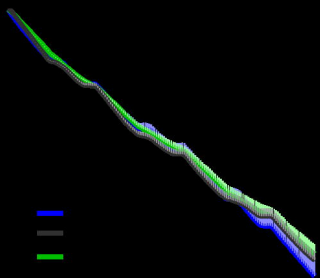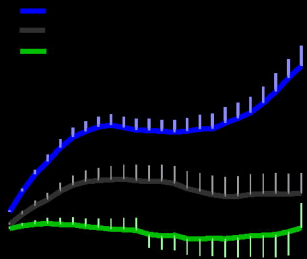

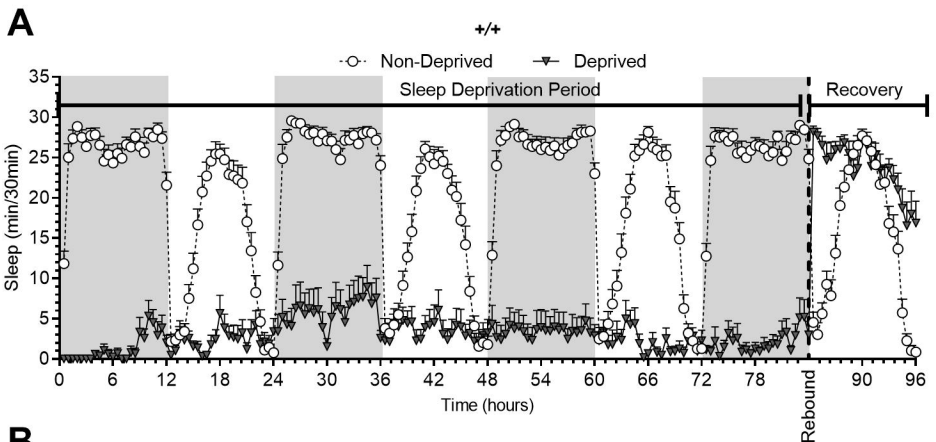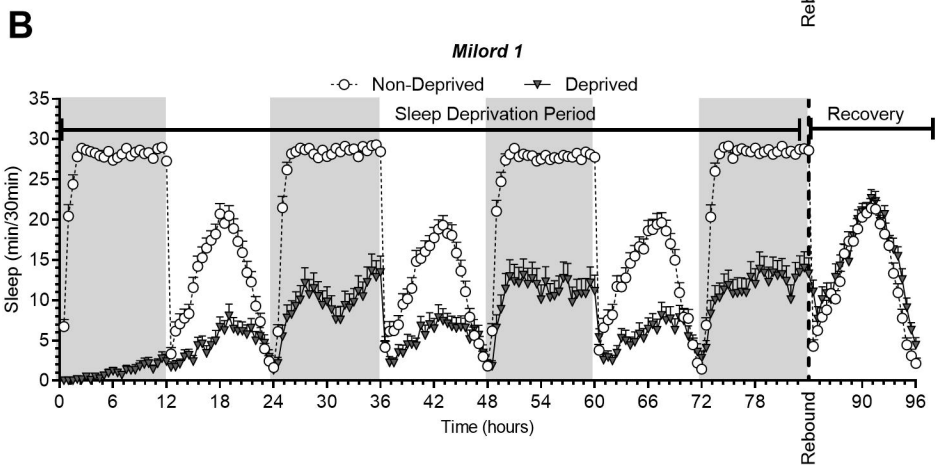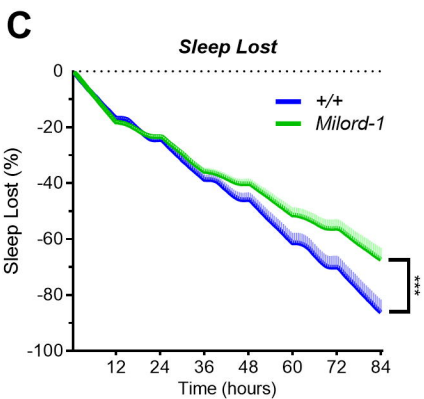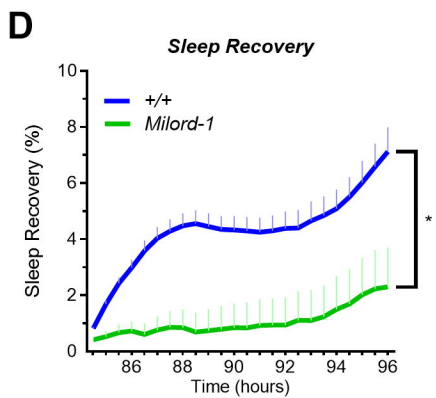

Source: https://www.biorxiv.org/content/10.1101/833822v1.full.pdf
